# Supplementary material for: The Evolutionarily Conserved Longevity Determinants HCF-1 and SIR-2.1/SIRT1 Collaborate to Regulate DAF-16/FOXO
Source: PubMed Central journal article supplement (PMC3164695; doi:10.1371/journal.pgen.1002235), 2011-09-01
Supplement: pgen.1002235.s007.pdf [file pgen.1002235.s007.pdf]

| <b>Table S1A</b>                                                             |                                  |                            |                |                       |                                        |                                         |                       |
|------------------------------------------------------------------------------|----------------------------------|----------------------------|----------------|-----------------------|----------------------------------------|-----------------------------------------|-----------------------|
| <b><i>sir-2.1(ok434) hcf-1(pk924)</i> double mutant analysis in lifespan</b> |                                  |                            |                |                       |                                        |                                         |                       |
| <b>Experiment</b>                                                            | <b>Strain</b>                    | <b>Mean LS + SEM(Days)</b> | <b>Total N</b> | <b>p-value vs. N2</b> | <b>p-value vs. <i>hcf-1(pk924)</i></b> | <b>p-value vs <i>sir-2.1(ok434)</i></b> | <b>% effect on N2</b> |
| <b>#1</b>                                                                    | N2                               | 14.3 ± 0.2                 | 102            |                       | <0.001                                 | 0.007                                   |                       |
|                                                                              | <i>hcf-1(pk924)</i>              | 17.8 ± 0.5                 | 102            | <0.001                |                                        | <0.001                                  | 24                    |
|                                                                              | <i>sir-2.1(ok434)</i>            | 13.3 ± 0.3                 | 100            | <0.001                | <0.001                                 |                                         | -7                    |
|                                                                              | <i>sir-2.1(-) hcf-1(-) (#1)</i>  | 17.0 ± 0.8                 | 51             | <0.001                | 0.906                                  | <0.001                                  | 19                    |
|                                                                              | <i>daf-16(mgDf47)</i>            | 9.4 ± 0.1                  | 102            | <0.001                | <0.001                                 | <0.001                                  | -34                   |
|                                                                              | <i>daf-16(-);hcf-1(-)</i>        | 8.7 ± 0.2                  | 92             | <0.001                | <0.001                                 | <0.001                                  | -39                   |
| <b>#2</b>                                                                    | N2                               | 13.9 ± 0.2                 | 102            |                       | <0.001                                 | 0.001                                   |                       |
|                                                                              | <i>hcf-1(pk924)</i>              | 17.5 ± 0.4                 | 114            | <0.001                |                                        | <0.001                                  | 26                    |
|                                                                              | <i>sir-2.1(ok434)</i>            | 12.8 ± 0.2                 | 99             | 0.001                 | <0.001                                 |                                         | -8                    |
|                                                                              | <i>sir-2.1(-) hcf-1(-) (#1)</i>  | 18.0 ± 0.5                 | 104            | <0.001                | <0.001                                 | <0.001                                  | 30                    |
|                                                                              | <i>daf-16(mgDf47)</i>            | 9.2 ± 0.1                  | 100            | <0.001                | <0.001                                 | <0.001                                  | -34                   |
|                                                                              | <i>daf-16(-);hcf-1(-)</i>        | 8.6 ± 0.2                  | 98             | <0.001                | 0.038                                  | <0.001                                  | -38                   |
| <b>#3</b>                                                                    | N2                               | 14.4 ± 0.2                 | 102            |                       | <0.001                                 | <0.001                                  |                       |
|                                                                              | <i>hcf-1(pk924)</i>              | 19.7 ± 0.5                 | 95             | <0.001                |                                        | <0.001                                  | 37                    |
|                                                                              | <i>sir-2.1(ok434)</i>            | 15.6 ± 0.3                 | 100            | <0.001                | <0.001                                 |                                         | 8                     |
|                                                                              | <i>sir-2.1(-) hcf-1(-) (#1)</i>  | 20.6 ± 0.8                 | 89             | <0.001                | 0.002                                  | <0.001                                  | 43                    |
|                                                                              | <i>sir-2.1(-) hcf-1(-) (#2)</i>  | 18.3 ± 0.5                 | 100            | <0.001                | 0.088                                  | <0.001                                  | 27                    |
|                                                                              | <i>sir-2.1(-) hcf-1(-) (#3)</i>  | 21.2 ± 0.7                 | 100            | <0.001                | 0.001                                  | <0.001                                  | 47                    |
|                                                                              | <i>sir-2.1(-) hcf-1(-) (#4)</i>  | 20.4 ± 0.6                 | 101            | <0.001                | 0.015                                  | <0.001                                  | 42                    |
|                                                                              | <i>daf-16(mgDf47)</i>            | 9.1 ± 0.1                  | 99             | <0.001                | <0.001                                 | <0.001                                  | -37                   |
|                                                                              | <i>daf-16(-);hcf-1(-)</i>        | 8.9 ± 0.1                  | 97             | <0.001                | <0.001                                 | <0.001                                  | -38                   |
|                                                                              | <b>#4</b>                        | N2                         | 14.5 ± 0.2     | 95                    |                                        | <0.001                                  | <0.001                |
|                                                                              | <i>hcf-1(pk924)</i>              | 18.0 ± 0.3                 | 95             | <0.001                |                                        | <0.001                                  | 24                    |
|                                                                              | <i>sir-2.1(ok434)</i>            | 15.3 ± 0.5                 | 92             | <0.001                | <0.001                                 |                                         | 6                     |
|                                                                              | <i>sir-2.1(-) hcf-1(-) (#1)</i>  | 17.4 ± 0.2                 | 92             | <0.001                | 0.859                                  | <0.001                                  | 19                    |
|                                                                              | <i>sir-2.1(-) hcf-1(-) (#2)</i>  | 18.8 ± 0.4                 | 97             | <0.001                | 0.569                                  | <0.001                                  | 20                    |
|                                                                              | <i>sir-2.1(-) hcf-1(-) (#3)</i>  | 19.3 ± 0.3                 | 71             | <0.001                | 0.056                                  | <0.001                                  | 30                    |
|                                                                              | <i>sir-2.1(-) hcf-1(-) (#4)</i>  | 18.2 ± 0.2                 | 105            | <0.001                | 0.002                                  | <0.001                                  | 34                    |
|                                                                              | <i>daf-16(mgDf47)</i>            | 9.2 ± 0.1                  | 106            | <0.001                | <0.001                                 | <0.001                                  | -37                   |
|                                                                              | <i>daf-16(-);hcf-1(-)</i>        | 10.0 ± 0.1                 | 94             | <0.001                | <0.001                                 | <0.001                                  | -31                   |
| <b>Kaplan Meier analysis - experiments pooled</b>                            |                                  |                            |                |                       |                                        |                                         |                       |
| <b>Experiment</b>                                                            | <b>Strain</b>                    | <b>Mean LS + SEM(Days)</b> | <b>Total N</b> | <b>p-value vs. N2</b> | <b>p-value vs. <i>hcf-1(pk924)</i></b> | <b>p-value vs <i>sir-2.1(ok434)</i></b> | <b>% effect on N2</b> |
| <b>#1-4 pooled</b>                                                           | N2                               | 14.3 ± 0.1                 | 400            |                       | <0.001                                 | 0.012                                   |                       |
| <b>Figure 1A</b>                                                             | <i>hcf-1(pk924)</i>              | 18.2 ± 0.2                 | 406            | <0.001                |                                        | <0.001                                  | 28                    |
|                                                                              | <i>sir-2.1(ok434)</i>            | 14.2 ± 0.1                 | 390            | 0.012                 | <0.001                                 |                                         | 0                     |
|                                                                              | <i>sir-2.1(-) hcf-1(-) (#1)</i>  | 18.4 ± 0.3                 | 336            | <0.001                | 0.004                                  | <0.001                                  | 28                    |
|                                                                              | <i>sir-2.1(-) hcf-1(-) (#2)*</i> | 17.9 ± 0.3                 | 196            | <0.001                | 0.556                                  | <0.001                                  | 25                    |
|                                                                              | <i>sir-2.1(-) hcf-1(-) (#3)</i>  | 20.2 ± 0.5                 | 170            | <0.001                | <0.001                                 | <0.001                                  | 41                    |
|                                                                              | <i>sir-2.1(-) hcf-1(-) (#4)</i>  | 19.9 ± 0.4                 | 205            | <0.001                | <0.001                                 | 0.001                                   | 39                    |
|                                                                              | <i>daf-16(mgDf47)</i>            | 9.2 ± 0.1                  | 406            | <0.001                | <0.001                                 | <0.001                                  | -35                   |
|                                                                              | <i>daf-16(-);hcf-1(-)</i>        | 9.1 ± 0.1                  | 380            | <0.001                | <0.001                                 | <0.001                                  | -37                   |

Table S1B

***pkIs1642[sir-2.1(O/E)] and hcf-1(pk924)* epistasis analysis in lifespan**

| Experiment | Strain                            | Mean LS + SEM(Days) | Total N | <i>p</i> -value vs. <i>hcf-1(pk924)</i> | <i>p</i> -value vs. <i>pkIs1641</i> | <i>p</i> -value vs. <i>pkIs1642</i> | % effect on <i>pkIs1641</i> |
|------------|-----------------------------------|---------------------|---------|-----------------------------------------|-------------------------------------|-------------------------------------|-----------------------------|
| #1         | N2                                | 15.4 ± 0.2          | 94      | <0.001                                  | 0.008                               | <0.001                              | 4                           |
|            | <i>hcf-1(pk924)</i>               | 18.4 ± 0.4          | 101     |                                         | <0.001                              | 0.002                               | 25                          |
|            | <i>pkIs1641[sir-2.1(wt)]</i>      | 14.7 ± 0.2          | 94      | <0.001                                  |                                     | <0.001                              |                             |
|            | <i>pkIs1642[sir-2.1(O/E)]</i>     | 17.5 ± 0.2          | 104     | 0.002                                   | <0.001                              |                                     | 19                          |
|            | <i>hcf-1(pk924);pkIs1642 (#1)</i> | 17.5 ± 0.4          | 88      | 0.122                                   | <0.001                              | 0.584                               | 19                          |
|            | <i>hcf-1(pk924);pkIs1642 (#2)</i> | 19.1 ± 0.4          | 69      | 0.401                                   | <0.001                              | <0.001                              | 30                          |
|            | <i>hcf-1(pk924);pkIs1642 (#3)</i> | 16.2 ± 0.3          | 110     | <0.001                                  | <0.001                              | 0.014                               | 10                          |
|            | <i>hcf-1(pk924);pkIs1642 (#4)</i> | 17.0 ± 0.4          | 88      | 0.004                                   | <0.001                              | 0.899                               | 15                          |
|            | <i>hcf-1(pk924);pkIs1642 (#5)</i> | 17.8 ± 0.3          | 103     | 0.058                                   | <0.001                              | 0.087                               | 21                          |
|            | <i>daf-16(mgDf50);pkIs1642</i>    | 8.5 ± 0.1           | 97      | <0.001                                  | <0.001                              | <0.001                              | -42                         |
| #2         | N2                                | 15.1 ± 0.1          | 99      | <0.001                                  | 0.428                               | <0.001                              | 1                           |
|            | <i>hcf-1(pk924)</i>               | 18.9 ± 0.3          | 96      |                                         | <0.001                              | 0.001                               | 26                          |
|            | <i>pkIs1641[sir-2.1(wt)]</i>      | 15.0 ± 0.3          | 98      | <0.001                                  |                                     | <0.001                              |                             |
|            | <i>pkIs1642[sir-2.1(O/E)]</i>     | 17.3 ± 0.3          | 101     | 0.001                                   | <0.001                              |                                     | 15                          |
|            | <i>hcf-1(pk924);pkIs1642 (#1)</i> | 16.7 ± 0.6          | 58      | 0.007                                   | <0.001                              | 0.971                               | 11                          |
|            | <i>hcf-1(pk924);pkIs1642 (#2)</i> | 19.1 ± 0.4          | 58      | 0.427                                   | <0.001                              | <0.001                              | 27                          |
|            | <i>hcf-1(pk924);pkIs1642 (#3)</i> | 15.9 ± 0.4          | 104     | <0.001                                  | <0.001                              | 0.002                               | 6                           |
|            | <i>hcf-1(pk924);pkIs1642 (#4)</i> | 16.5 ± 0.4          | 65      | <0.001                                  | 0.002                               | 0.056                               | 10                          |
|            | <i>hcf-1(pk924);pkIs1642 (#5)</i> | 17.3 ± 0.3          | 95      | <0.001                                  | <0.001                              | 0.982                               | 15                          |
|            | <i>daf-16(mgDf50);pkIs1642</i>    | 8.5 ± 0.1           | 97      | <0.001                                  | <0.001                              | <0.001                              | -43                         |
| #3         | N2                                | 15.0 ± 0.2          | 98      | <0.001                                  | 0.727                               | 0.007                               | 0                           |
|            | <i>hcf-1(pk924)</i>               | 18.9 ± 0.3          | 100     |                                         | <0.001                              | <0.001                              | 28                          |
|            | <i>pkIs1641[sir-2.1(wt)]</i>      | 15.4 ± 0.2          | 102     | <0.001                                  |                                     | <0.001                              |                             |
|            | <i>pkIs1642[sir-2.1(O/E)]</i>     | 18.1 ± 0.3          | 94      | <0.001                                  | <0.001                              |                                     | 17                          |
|            | <i>hcf-1(pk924);pkIs1642 (#1)</i> | 17.1 ± 0.4          | 80      | 0.007                                   | <0.001                              | 0.573                               | 13                          |
|            | <i>hcf-1(pk924);pkIs1642 (#2)</i> | 18.4 ± 0.5          | 80      | 0.087                                   | <0.001                              | <0.001                              | 25                          |
|            | <i>hcf-1(pk924);pkIs1642 (#3)</i> | 15.5 ± 0.3          | 107     | <0.001                                  | <0.001                              | <0.001                              | 5                           |
|            | <i>hcf-1(pk924);pkIs1642 (#4)</i> | 17.5 ± 0.3          | 96      | <0.001                                  | <0.002                              | <0.001                              | 9                           |
|            | <i>hcf-1(pk924);pkIs1642 (#5)</i> | 17.5 ± 0.3          | 96      | <0.001                                  | <0.001                              | 0.924                               | 16                          |
|            | <i>daf-16(mgDf50);pkIs1642</i>    | 9.1 ± 0.1           | 87      | <0.001                                  | <0.001                              | <0.001                              | -42                         |

**Kaplan Meier analysis - experiments pooled**

| Experiment  | Strain                             | Mean LS + SEM(Days) | Total N | <i>p</i> -value vs. <i>hcf-1(pk924)</i> | <i>p</i> -value vs. <i>pkIs1641</i> | <i>p</i> -value vs. <i>pkIs1642</i> | % effect on <i>pkIs1641</i> |
|-------------|------------------------------------|---------------------|---------|-----------------------------------------|-------------------------------------|-------------------------------------|-----------------------------|
| #1-3 pooled | N2                                 | 15.1 ± 0.1          | 292     | <0.001                                  | 0.727                               | 0.007                               | 0                           |
| Figure 1B   | <i>hcf-1(pk924)</i>                | 19.4 ± 0.2          | 305     |                                         | <0.001                              | <0.001                              | 28                          |
|             | <i>pkIs1641[sir-2.1(wt)]</i>       | 15.1 ± 0.1          | 294     | <0.001                                  |                                     | <0.001                              |                             |
|             | <i>pkIs1642[sir-2.1(O/E)]</i>      | 17.6 ± 0.2          | 299     | <0.001                                  | <0.001                              |                                     | 17                          |
|             | <i>hcf-1(pk924);pkIs1642 (#1)</i>  | 17.1 ± 0.3          | 226     | <0.001                                  | <0.001                              | 0.573                               | 13                          |
|             | <i>hcf-1(pk924);pkIs1642 (#2)*</i> | 18.9 ± 0.2          | 240     | 0.087                                   | <0.001                              | <0.001                              | 25                          |
|             | <i>hcf-1(pk924);pkIs1642 (#3)</i>  | 15.9 ± 0.2          | 321     | <0.001                                  | <0.001                              | <0.001                              | 5                           |
|             | <i>hcf-1(pk924);pkIs1642 (#4)</i>  | 16.5 ± 0.2          | 253     | <0.001                                  | <0.001                              | <0.001                              | 9                           |
|             | <i>hcf-1(pk924);pkIs1642 (#5)</i>  | 17.5 ± 0.2          | 294     | <0.001                                  | <0.001                              | <0.001                              | 16                          |
|             | <i>daf-16(mgDf50);pkIs1642</i>     | 8.7 ± 0.1           | 285     | <0.001                                  | <0.001                              | 0.924                               | -42                         |

| <b>Table S1C</b>                                                                                        |                                 |                                                  |                |                                              |                                        |                       |
|---------------------------------------------------------------------------------------------------------|---------------------------------|--------------------------------------------------|----------------|----------------------------------------------|----------------------------------------|-----------------------|
| <b><i>sir-2.1(ok434)</i> and <i>hcf-1(pk924)</i> epistasis analysis in <i>t</i>-Butyl hydroperoxide</b> |                                 |                                                  |                |                                              |                                        |                       |
| <b>Kaplan Meier analysis</b>                                                                            |                                 |                                                  |                |                                              |                                        |                       |
| <b>Experiment</b>                                                                                       | <b>Strain</b>                   | <b>Mean survival + SEM(Hrs)</b>                  | <b>Total N</b> | <b>% effect on N2</b>                        |                                        |                       |
| <b>#1</b>                                                                                               | N2                              | 26.2 ± 0.6                                       | 127            |                                              |                                        |                       |
|                                                                                                         | <i>hcf-1(pk924)</i>             | 41.8 ± 1.2                                       | 105            | 59.8                                         |                                        |                       |
|                                                                                                         | <i>sir-2.1(ok434)</i>           | 19.0 ± 0.5                                       | 109            | -27.2                                        |                                        |                       |
|                                                                                                         | <i>sir-2.1(-) hcf-1(-)</i> (#1) | 43.4 ± 1.2                                       | 105            | 66.1                                         |                                        |                       |
|                                                                                                         | <i>sir-2.1(-) hcf-1(-)</i> (#2) | 40.2 ± 1.3                                       | 107            | 53.5                                         |                                        |                       |
| <b>#2</b>                                                                                               | N2                              | 24.9 ± 0.9                                       | 113            |                                              |                                        |                       |
|                                                                                                         | <i>hcf-1(pk924)</i>             | 58.7 ± 2.0                                       | 108            | 136.3                                        |                                        |                       |
|                                                                                                         | <i>sir-2.1(ok434)</i>           | 23.9 ± 1.1                                       | 103            | -3.7                                         |                                        |                       |
|                                                                                                         | <i>sir-2.1(-) hcf-1(-)</i> (#1) | 73.2 ± 2.7                                       | 88             | 194.5                                        |                                        |                       |
|                                                                                                         | <i>sir-2.1(-) hcf-1(-)</i> (#2) | 55.0 ± 2.1                                       | 114            | 121.4                                        |                                        |                       |
| <b>Linear Mixed model analysis</b>                                                                      |                                 |                                                  |                |                                              |                                        |                       |
| <b>#1, 2 pooled</b>                                                                                     | <b>Strain</b>                   | <b>Averaged % variation compared to wt ± SEM</b> | <b>Total N</b> | <b>p-value vs. <i>sir-2.1(-) hcf1(-)</i></b> |                                        |                       |
| <b>Figure S1A</b>                                                                                       | <i>sir-2.1(ok434)</i>           | -15.5 ± 43.1                                     | 212            | 0.035                                        |                                        |                       |
|                                                                                                         | <i>hcf-1(pk924)</i>             | 98.0 ± 48.9                                      | 213            | 0.715                                        |                                        |                       |
|                                                                                                         | <i>sir-2.1(-) hcf-1(-)</i>      | 108.9 ± 46.3                                     | 414            |                                              |                                        |                       |
| <b>Kaplan Meier analysis - experiments and double mutants pooled</b>                                    |                                 |                                                  |                |                                              |                                        |                       |
| <b>Experiment</b>                                                                                       | <b>Strain</b>                   | <b>Mean survival + SEM(Hrs)</b>                  | <b>Total N</b> | <b>p-value vs. N2</b>                        | <b>p-value vs. <i>hcf-1(pk924)</i></b> | <b>% effect on N2</b> |
| <b>#1, 2 pooled</b>                                                                                     | N2                              | 25.5 ± 0.5                                       | 240            |                                              | <0.001                                 |                       |
| <b>Figure 1C</b>                                                                                        | <i>hcf-1(pk924)</i>             | 50.1 ± 1.3                                       | 212            | <0.001                                       |                                        | 96.0                  |
|                                                                                                         | <i>sir-2.1(ok434)</i>           | 21.4 ± 0.6                                       | 213            | <0.001                                       | <0.001                                 | -16.4                 |
|                                                                                                         | <i>sir-2.1(-) hcf-1(-)</i>      | 52.2 ± 1.1                                       | 414            | <0.001                                       | 0.193                                  | 104.3                 |

| <b>Table S1D</b>                                                                                                |                                   |                                                  |                                                               |                              |                                                                        |                       |
|-----------------------------------------------------------------------------------------------------------------|-----------------------------------|--------------------------------------------------|---------------------------------------------------------------|------------------------------|------------------------------------------------------------------------|-----------------------|
| <b><i>pkls1642[sir-2.1(O/E)]</i> and <i>hcf-1(pk924)</i> epistasis analysis in <i>t</i>-Butyl hydroperoxide</b> |                                   |                                                  |                                                               |                              |                                                                        |                       |
| <b>Kaplan Meier analysis</b>                                                                                    |                                   |                                                  |                                                               |                              |                                                                        |                       |
| <b>Experiment</b>                                                                                               | <b>Strain</b>                     | <b>Mean survival + SEM(Hrs)</b>                  | <b>Total N</b>                                                | <b>% effect on N2</b>        | <b>% effect on <i>pkls1641</i></b>                                     |                       |
| <b>#1</b>                                                                                                       | N2                                | 26.2 ± 0.6                                       | 127                                                           |                              | 11.4                                                                   |                       |
|                                                                                                                 | <i>pkls1641[sir-2.1(wt)]</i>      | 23.5 ± 0.6                                       | 100                                                           | -10.2                        |                                                                        |                       |
|                                                                                                                 | <i>hcf-1(pk924)</i>               | 41.8 ± 1.2                                       | 105                                                           | 59.8                         | 32.0                                                                   |                       |
|                                                                                                                 | <i>pkls1642[sir-2.1(O/E)]</i>     | 31.0 ± 0.4                                       | 118                                                           | 18.5                         | 78.0                                                                   |                       |
|                                                                                                                 | <i>hcf-1(pk924);pkls1642 (#1)</i> | 32.3 ± 0.6                                       | 115                                                           | 23.4                         | 37.5                                                                   |                       |
|                                                                                                                 | <i>hcf-1(pk924);pkls1642 (#2)</i> | 43.0 ± 1.1                                       | 108                                                           | 64.3                         | 83.0                                                                   |                       |
| <b>#2</b>                                                                                                       | N2                                | 24.9 ± 0.9                                       | 113                                                           |                              | 13.3                                                                   |                       |
|                                                                                                                 | <i>pkls1641[sir-2.1(wt)]</i>      | 21.9 ± 0.7                                       | 101                                                           | -11.8                        |                                                                        |                       |
|                                                                                                                 | <i>hcf-1(pk924)</i>               | 58.7 ± 2.0                                       | 108                                                           | 136.3                        | 167.7                                                                  |                       |
|                                                                                                                 | <i>pkls1642[sir-2.1(O/E)]</i>     | 52.3 ± 1.2                                       | 109                                                           | 110.4                        | 138.4                                                                  |                       |
|                                                                                                                 | <i>hcf-1(pk924);pkls1642 (#1)</i> | 46.2 ± 1.2                                       | 103                                                           | 86.1                         | 110.8                                                                  |                       |
|                                                                                                                 | <i>hcf-1(pk924);pkls1642 (#2)</i> | 68.6 ± 1.7                                       | 102                                                           | 176.0                        | 212.7                                                                  |                       |
| <b>Linear Mixed model analysis</b>                                                                              |                                   |                                                  |                                                               |                              |                                                                        |                       |
| <b>#1, 2 pooled</b>                                                                                             | <b>Strain</b>                     | <b>Averaged % variation compared to wt ± SEM</b> | <b>Averaged % variation compared to <i>pkls1641</i> ± SEM</b> | <b>Total N</b>               | <b><i>p</i>-value vs. <i>hcf-1(pk924);pkls1642 (wt / pkls1641)</i></b> |                       |
| <b>Figure S1B</b>                                                                                               | <i>pkls1642[sir-2.1(O/E)]</i>     | 64.4 ± 50.1                                      | 85.2 ± 57.9                                                   | 227                          | 0.557 / 0.560                                                          |                       |
|                                                                                                                 | <i>hcf-1(pk924)</i>               | 98.0 ± 47.9                                      | 122.9 ± 55.5                                                  | 213                          | 0.782 / 0.784                                                          |                       |
|                                                                                                                 | <i>hcf-1(pk924);pkls1642</i>      | 87.4 ± 43.4                                      | 111.0 ± 50.4                                                  | 428                          |                                                                        |                       |
| <b>Kaplan Meier analysis - experiments and double mutants pooled</b>                                            |                                   |                                                  |                                                               |                              |                                                                        |                       |
| <b>Experiment</b>                                                                                               | <b>Strain</b>                     | <b>Mean survival + SEM(Hrs)</b>                  | <b>Total N</b>                                                | <b><i>p</i>-value vs. N2</b> | <b><i>p</i>-value vs. <i>hcf-1(pk924)</i></b>                          | <b>% effect on N2</b> |
| <b>#1, 2 pooled</b>                                                                                             | N2                                | 25.5 ± 0.5                                       | 240                                                           |                              | <0.001                                                                 |                       |
| <b>Figure 1D</b>                                                                                                | <i>pkls1641[sir-2.1(wt)]</i>      | 22.7 ± 0.5                                       | 201                                                           | <0.001                       | <0.001                                                                 | -11.1                 |
|                                                                                                                 | <i>hcf-1(pk924)</i>               | 50.1 ± 1.3                                       | 213                                                           | <0.001                       |                                                                        | 96.0                  |
|                                                                                                                 | <i>pkls1642[sir-2.1(O/E)]</i>     | 41.3 ± 1.0                                       | 227                                                           | <0.001                       | <0.001                                                                 | 61.5                  |
|                                                                                                                 | <i>hcf-1(pk924);pkls1642</i>      | 47.0 ± 0.9                                       | 428                                                           | <0.001                       | 0.093                                                                  | 83.9                  |

| <b>Table S1E</b>                                                                    |                                 |                                                  |                |                                              |                                        |                       |
|-------------------------------------------------------------------------------------|---------------------------------|--------------------------------------------------|----------------|----------------------------------------------|----------------------------------------|-----------------------|
| <b><i>sir-2.1(ok434)</i> and <i>hcf-1(pk924)</i> epistasis analysis in paraquat</b> |                                 |                                                  |                |                                              |                                        |                       |
| <b>Kaplan Meier analysis</b>                                                        |                                 |                                                  |                |                                              |                                        |                       |
| <b>Experiment</b>                                                                   | <b>Strain</b>                   | <b>Mean survival + SEM(Hrs)</b>                  | <b>Total N</b> | <b>% effect on N2</b>                        |                                        |                       |
| <b>#1</b>                                                                           | N2                              | 21.0 ± 1.2                                       | 156            |                                              |                                        |                       |
|                                                                                     | <i>hcf-1(pk924)</i>             | 35.9 ± 1.4                                       | 177            | 71.0                                         |                                        |                       |
|                                                                                     | <i>sir-2.1(ok434)</i>           | 18.6 ± 1.3                                       | 193            | -11.1                                        |                                        |                       |
|                                                                                     | <i>sir-2.1(-) hcf-1(-)</i> (#1) | 37.3 ± 1.8                                       | 152            | 77.8                                         |                                        |                       |
|                                                                                     | <i>sir-2.1(-) hcf-1(-)</i> (#2) | 29.3 ± 2.0                                       | 135            | 39.8                                         |                                        |                       |
|                                                                                     | <i>sir-2.1(-) hcf-1(-)</i> (#3) | 34.9 ± 1.7                                       | 157            | 66.2                                         |                                        |                       |
| <b>#2</b>                                                                           | <i>sir-2.1(-) hcf-1(-)</i> (#4) | 36.5 ± 1.5                                       | 183            | 74.0                                         |                                        |                       |
|                                                                                     | N2                              | 33.5 ± 1.1                                       | 281            |                                              |                                        |                       |
|                                                                                     | <i>hcf-1(pk924)</i>             | 44.6 ± 1.0                                       | 277            | 33.2                                         |                                        |                       |
|                                                                                     | <i>sir-2.1(ok434)</i>           | 26.9 ± 1.1                                       | 295            | -19.7                                        |                                        |                       |
|                                                                                     | <i>sir-2.1(-) hcf-1(-)</i> (#1) | 30.4 ± 1.9                                       | 116            | -9.2                                         |                                        |                       |
|                                                                                     | <i>sir-2.1(-) hcf-1(-)</i> (#2) | 39.4 ± 1.3                                       | 303            | 17.6                                         |                                        |                       |
|                                                                                     | <i>sir-2.1(-) hcf-1(-)</i> (#3) | 40.9 ± 2.0                                       | 129            | 22.0                                         |                                        |                       |
|                                                                                     | <i>sir-2.1(-) hcf-1(-)</i> (#4) | 40.3 ± 0.8                                       | 549            | 20.3                                         |                                        |                       |
| <b>Linear Mixed model analysis</b>                                                  |                                 |                                                  |                |                                              |                                        |                       |
| <b>#1, 2 pooled</b>                                                                 | <b>Strain</b>                   | <b>Averaged % variation compared to wt ± SEM</b> | <b>Total N</b> | <b>p-value vs. <i>sir-2.1(-) hcf1(-)</i></b> |                                        |                       |
| <b>Figure S1C</b>                                                                   | <i>sir-2.1(ok434)</i>           | -15.4 ± 24.4                                     | 488            | 0.007                                        |                                        |                       |
|                                                                                     | <i>hcf-1(pk924)</i>             | 52.1 ± 26.3                                      | 454            | 0.296                                        |                                        |                       |
|                                                                                     | <i>sir-2.1(-) hcf-1(-)</i>      | 38.6 ± 22.1                                      | 1725           |                                              |                                        |                       |
| <b>Kaplan Meier analysis - experiments and double mutants pooled</b>                |                                 |                                                  |                |                                              |                                        |                       |
| <b>Experiment</b>                                                                   | <b>Strain</b>                   | <b>Mean survival + SEM(Hrs)</b>                  | <b>Total N</b> | <b>p-value vs. N2</b>                        | <b>p-value vs. <i>hcf-1(pk924)</i></b> | <b>% effect on N2</b> |
| <b>#1,2 pooled</b>                                                                  | N2                              | 21.0 ± 1.2                                       | 295            |                                              | <0.001                                 |                       |
|                                                                                     | <i>hcf-1(pk924)</i>             | 35.9 ± 1.4                                       | 314            | 0.017                                        |                                        | 47.5                  |
|                                                                                     | <i>sir-2.1(ok434)</i>           | 18.6 ± 1.3                                       | 339            | <0.001                                       | <0.001                                 | -17.4                 |
|                                                                                     | <i>sir-2.1(-) hcf-1(-)</i>      | 37.3 ± 1.8                                       | 1079           | <0.001                                       | 0.686                                  | 36.7                  |

| <b>Table S1F</b>                                                                            |                                    |                                                  |                                                               |                              |                                                                                |                       |
|---------------------------------------------------------------------------------------------|------------------------------------|--------------------------------------------------|---------------------------------------------------------------|------------------------------|--------------------------------------------------------------------------------|-----------------------|
| <b><i>pkls1642[sir-2.1(O/E)]</i> and <i>hcf-1(pk924)</i> epistasis analysis in paraquat</b> |                                    |                                                  |                                                               |                              |                                                                                |                       |
| <b>Kaplan Meier analysis</b>                                                                |                                    |                                                  |                                                               |                              |                                                                                |                       |
| <b>Experiment</b>                                                                           | <b>Strain</b>                      | <b>Mean survival + SEM(Hrs)</b>                  | <b>Total N</b>                                                | <b>% effect on N2</b>        | <b>% effect on <i>pkls1641</i></b>                                             |                       |
| <b>#1</b>                                                                                   | N2                                 | 4.8 ± 0.1                                        | 114                                                           |                              | -8.4                                                                           |                       |
|                                                                                             | <i>pkls1641[sir-2.1(wt)]</i>       | 5.2 ± 0.2                                        | 109                                                           | 9.2                          |                                                                                |                       |
|                                                                                             | <i>hcf-1(pk924)</i>                | 12.3 ± 0.7                                       | 109                                                           | 157.8                        | 136.1                                                                          |                       |
|                                                                                             | <i>pkls1642[sir-2.1(O/E)]</i>      | 13.0 ± 0.5                                       | 115                                                           | 171.5                        | 148.6                                                                          |                       |
|                                                                                             | <i>hcf-1(pk924); pkls1642 (#1)</i> | 9.2 ± 0.6                                        | 98                                                            | 93.7                         | 77.4                                                                           |                       |
|                                                                                             | <i>hcf-1(pk924);pkls1642 (#2)</i>  | 18.8 ± 0.7                                       | 109                                                           | 294.7                        | 261.4                                                                          |                       |
| <b>#2</b>                                                                                   | N2                                 | 5.5 ± 0.2                                        | 116                                                           |                              | -12.3                                                                          |                       |
|                                                                                             | <i>pkls1641[sir-2.1(wt)]</i>       | 6.3 ± 0.3                                        | 117                                                           | 14.1                         |                                                                                |                       |
|                                                                                             | <i>hcf-1(pk924)</i>                | 9.5 ± 0.4                                        | 120                                                           | 71.0                         | 49.9                                                                           |                       |
|                                                                                             | <i>pkls1642[sir-2.1(O/E)]</i>      | 10.3 ± 0.5                                       | 115                                                           | 84.8                         | 62.0                                                                           |                       |
|                                                                                             | <i>hcf-1(pk924);pkls1642 (#1)</i>  | 8.5 ± 0.5                                        | 110                                                           | 53.3                         | 34.4                                                                           |                       |
|                                                                                             | <i>hcf-1(pk924);pkls1642 (#2)</i>  | 18.9 ± 0.6                                       | 115                                                           | 240.3                        | 198.4                                                                          |                       |
| <b>Linear Mixed model analysis</b>                                                          |                                    |                                                  |                                                               |                              |                                                                                |                       |
| <b>#1,2 pooled</b>                                                                          | <b>Strain</b>                      | <b>Averaged % variation compared to wt ± SEM</b> | <b>Averaged % variation compared to <i>pkls1641</i> ± SEM</b> | <b>Total N</b>               | <b><i>p</i>-value vs. <i>hcf-1(pk924); pkls1642 (wt / <i>pkls1641</i>)</i></b> |                       |
| <b>Figure S1D</b>                                                                           | <i>pkls1642[sir-2.1(O/E)]</i>      | 128.2 ± 73.9                                     | 105.3 ± 68.0                                                  | 230                          | 0.664 / 0.581                                                                  |                       |
|                                                                                             | <i>hcf-1(pk924)</i>                | 114.4 ± 73.9                                     | 93.0 ± 67.9                                                   | 229                          | 0.569 / 0.675                                                                  |                       |
|                                                                                             | <i>hcf-1(pk924);pkls1642</i>       | 170.5 ± 52.3                                     | 142.9 ± 48.1                                                  | 432                          |                                                                                |                       |
| <b>Kaplan Meier analysis - experiments and double mutants pooled</b>                        |                                    |                                                  |                                                               |                              |                                                                                |                       |
| <b>Experiment</b>                                                                           | <b>Strain</b>                      | <b>Mean survival + SEM(Hrs)</b>                  | <b>Total N</b>                                                | <b><i>p</i>-value vs. N2</b> | <b><i>p</i>-value vs. <i>hcf-1(pk924)</i></b>                                  | <b>% effect on N2</b> |
| <b>#1, 2 pooled</b>                                                                         | N2                                 | 4.8 ± 0.1                                        | 114                                                           |                              | <0.001                                                                         |                       |
| <b>Figure 1F</b>                                                                            | <i>pkls1641[sir-2.1(wt)]</i>       | 5.2 ± 0.2                                        | 109                                                           | 0.105                        | <0.001                                                                         | 9.2                   |
|                                                                                             | <i>hcf-1(pk924)</i>                | 12.3 ± 0.7                                       | 109                                                           | <0.001                       |                                                                                | 157.8                 |
|                                                                                             | <i>pkls1642[sir-2.1(O/E)]</i>      | 13.0 ± 0.5                                       | 115                                                           | <0.001                       | 0.831                                                                          | 171.5                 |
|                                                                                             | <i>hcf-1(pk924); pkls1642</i>      | 14.3 ± 0.6                                       | 207                                                           | <0.001                       | 0.116                                                                          | 199.6                 |

**Table S1G****Non-outcrossed and outcrossed *pkIs1642 [sir-2.1(O/E)]* lifespan analysis**

| Strain                        | Mean LS + SEM(Days) | Total N | <i>p</i> -value vs. N2 | <i>p</i> -value vs. <i>sir-2.1(wt)</i> | <i>p</i> -value vs <i>sir-2.1(wt)-1X</i> | % effect on N2 |
|-------------------------------|---------------------|---------|------------------------|----------------------------------------|------------------------------------------|----------------|
| N2                            | 14.9 ± 0.1          | 97      |                        | 0.832                                  | 0.003                                    |                |
| <i>pkIs1641[sir-2.1(wt)]</i>  | 14.7 ± 0.2          | 93      | 0.832                  |                                        | 0.004                                    | -2             |
| <i>pkIs1642[sir-2.1(O/E)]</i> | 17.1 ± 0.3          | 97      | <0.001                 | <0.001                                 | <0.001                                   | 14             |
| <i>sir-2.1(wt)-1X</i>         | 14.3 ± 0.1          | 100     | 0.003                  | 0.004                                  |                                          | -4             |
| <i>sir-2.1(O/E)-1X</i>        | 17.2 ± 0.2          | 95      | <0.001                 | <0.001                                 | <0.001                                   | 16             |

**Table S1H*****sir-2.1* RNAi knockdown lifespan analysis**

| Strain + RNAi                 | Mean LS + SEM(Days) | Total N | <i>p</i> -value vs. N2 | <i>p</i> -value vs. <i>sir-2.1(wt) + ctrl</i> RNAi | <i>p</i> -value vs <i>sir-2.1(wt) + sir-2.1</i> RNAi | % effect on N2+ <i>ctrl</i> |
|-------------------------------|---------------------|---------|------------------------|----------------------------------------------------|------------------------------------------------------|-----------------------------|
| N2 + <i>ctrl</i>              | 13.8 ± 0.3          | 95      |                        | 0.200                                              | 0.314                                                |                             |
| N2 + <i>sir-2.1</i>           | 13.7 ± 0.2          | 96      | 0.144                  | 0.897                                              | 0.669                                                | -1                          |
| <i>sir-2.1(wt) + ctrl</i>     | 13.7 ± 0.2          | 94      | 0.200                  |                                                    | 0.767                                                | -1                          |
| <i>sir-2.1(wt) + sir-2.1</i>  | 13.8 ± 0.2          | 87      | 0.314                  | 0.767                                              |                                                      | 0                           |
| <i>sir-2.1(O/E) + ctrl</i>    | 16.1 ± 0.3          | 96      | <0.001                 | <0.001                                             | <0.001                                               | 16                          |
| <i>sir-2.1(O/E) + sir-2.1</i> | 14.3 ± 0.3          | 94      | 0.192                  | 0.009                                              | 0.020                                                | 3                           |
