# Supplementary material for: The Evolutionarily Conserved Longevity Determinants HCF-1 and SIR-2.1/SIRT1 Collaborate to Regulate DAF-16/FOXO
Source: PubMed Central journal article supplement (PMC3164695; doi:10.1371/journal.pgen.1002235), 2011-09-01
Supplement: pgen.1002235.s008.pdf [file pgen.1002235.s008.pdf]

| <b>Table S2A</b>                                                                                              |                |                     |         |                                                                         |                       |                                           |
|---------------------------------------------------------------------------------------------------------------|----------------|---------------------|---------|-------------------------------------------------------------------------|-----------------------|-------------------------------------------|
| <b><i>ftt-2</i> or <i>ftt-2</i> gene specific RNAi and <i>hcf-1(pk924)</i> epistasis analysis in lifespan</b> |                |                     |         |                                                                         |                       |                                           |
| Strain                                                                                                        | RNAi           | Mean LS + SEM(Days) | Total N | % lifespan extension by <i>hcf-1(-)+</i> RNAi vs. corresponding N2+RNAi | p-value vs. N2+vector | p-value vs. <i>hcf-1(-)</i> + vector RNAi |
| N2                                                                                                            | vector         | 18.6 ± 0.2          | 90      |                                                                         |                       | <0.001                                    |
|                                                                                                               | <i>ftt-2</i>   | 14.0 ± 0.3          | 95      |                                                                         | <0.001                | <0.001                                    |
|                                                                                                               | <i>ftt-2gs</i> | 17.0 ± 0.2          | 89      |                                                                         | <0.001                | <0.001                                    |
|                                                                                                               | <i>daf-16</i>  | 11.7 ± 0.2          | 93      |                                                                         | <0.001                | <0.001                                    |
| <i>hcf-1(pk924)</i>                                                                                           | vector         | 22.5 ± 0.4          | 98      | 21.0                                                                    | <0.001                |                                           |
|                                                                                                               | <i>ftt-2</i>   | 12.4 ± 0.3          | 97      | -11.9                                                                   | <0.001                | <0.001                                    |
|                                                                                                               | <i>ftt-2gs</i> | 20.5 ± 0.4          | 106     | 20.4                                                                    | <0.001                | <0.001                                    |
|                                                                                                               | <i>daf-16</i>  | 11.8 ± 0.1          | 109     | 0.7                                                                     | <0.001                | <0.001                                    |

| <b>Table S2B</b>                                                                                              |                |                     |         |                                                                         |                       |                                           |
|---------------------------------------------------------------------------------------------------------------|----------------|---------------------|---------|-------------------------------------------------------------------------|-----------------------|-------------------------------------------|
| <b><i>par-5</i> or <i>par-5</i> gene specific RNAi and <i>hcf-1(pk924)</i> epistasis analysis in lifespan</b> |                |                     |         |                                                                         |                       |                                           |
| Strain                                                                                                        | RNAi           | Mean LS + SEM(Days) | Total N | % lifespan extension by <i>hcf-1(-)</i> +RNAi vs. corresponding N2+RNAi | p-value vs. N2+vector | p-value vs. <i>hcf-1(-)</i> + vector RNAi |
| N2                                                                                                            | vector         | 18.6 ± 0.2          | 120     |                                                                         |                       | <0.001                                    |
|                                                                                                               | <i>par-5</i>   | 13.3 ± 0.2          | 114     |                                                                         | <0.001                | <0.001                                    |
|                                                                                                               | <i>par-5gs</i> | 18.6 ± 0.2          | 115     |                                                                         | <0.001                | <0.001                                    |
|                                                                                                               | <i>daf-16</i>  | 11.1 ± 0.1          | 103     |                                                                         | <0.001                | <0.001                                    |
| <i>hcf-1(pk924)</i>                                                                                           | vector         | 25.0 ± 0.6          | 97      | 34.6                                                                    | <0.001                |                                           |
|                                                                                                               | <i>par-5</i>   | 10.8 ± 0.2          | 97      | -18.6                                                                   | <0.001                | <0.001                                    |
|                                                                                                               | <i>par-5gs</i> | 25.0 ± 0.5          | 92      | 34.3                                                                    | <0.001                | 0.645                                     |
|                                                                                                               | <i>daf-16</i>  | 10.7 ± 0.2          | 91      | -3.6                                                                    | <0.001                | <0.001                                    |

| Table S2C                                                                                                               |                               |              |                     |         |                                     |                                           |                           |
|-------------------------------------------------------------------------------------------------------------------------|-------------------------------|--------------|---------------------|---------|-------------------------------------|-------------------------------------------|---------------------------|
| <i>ftt-2</i> RNAi and <i>hcf-1(pk924)</i> , <i>sir-2.1(O/E)</i> , or <i>daf-2(e1370)</i> epistasis analysis in lifespan |                               |              |                     |         |                                     |                                           |                           |
| Experiment                                                                                                              | Strain                        | RNAi         | Mean LS + SEM(Days) | Total N | % lifespan extension on vector RNAi | % lifespan extension on <i>ftt-2</i> RNAi | p-value vs. control+ RNAi |
| #1                                                                                                                      | N2                            | vector       | 16.7 ± 0.3          | 103     |                                     |                                           |                           |
|                                                                                                                         |                               | <i>ftt-2</i> | 15.8 ± 0.2          | 100     |                                     |                                           |                           |
|                                                                                                                         | <i>hcf-1(pk924)</i>           | vector       | 18.3 ± 0.3          | 103     | 9 (vs. N2)                          |                                           | <0.001 <sup>a</sup>       |
|                                                                                                                         |                               | <i>ftt-2</i> | 15.6 ± 0.2          | 106     |                                     | -1                                        | 0.885 <sup>b</sup>        |
|                                                                                                                         | <i>pkls1641[sir-2.1(wt)]</i>  | vector       | 18.7 ± 0.3          | 107     |                                     |                                           |                           |
|                                                                                                                         |                               | <i>ftt-2</i> | 16.0 ± 0.2          | 111     |                                     |                                           |                           |
|                                                                                                                         | <i>pkls1642[sir-2.1(O/E)]</i> | vector       | 21.0 ± 0.3          | 107     | 12 (vs. <i>pkls1641</i> )           |                                           | <0.001 <sup>c</sup>       |
|                                                                                                                         |                               | <i>ftt-2</i> | 16.6 ± 0.3          | 112     |                                     | -4                                        | 0.050 <sup>d</sup>        |
|                                                                                                                         | <i>daf-2(e1370)</i>           | vector       | 30.3 ± 1.1          | 100     | 81 (vs. N2)                         |                                           | <0.001 <sup>a</sup>       |
|                                                                                                                         |                               | <i>ftt-2</i> | 26.9 ± 1.2          | 99      |                                     | 71                                        | <0.001 <sup>b</sup>       |
| #2                                                                                                                      | N2                            | vector       | 16.8 ± 0.2          | 104     |                                     |                                           |                           |
|                                                                                                                         |                               | <i>ftt-2</i> | 16.3 ± 0.2          | 108     |                                     |                                           |                           |
|                                                                                                                         | <i>hcf-1(pk924)</i>           | vector       | 18.0 ± 0.3          | 104     | 7 (vs. N2)                          |                                           | 0.002 <sup>a</sup>        |
|                                                                                                                         |                               | <i>ftt-2</i> | 15.6 ± 0.3          | 102     |                                     | -4                                        | 0.070 <sup>b</sup>        |
|                                                                                                                         | <i>pkls1641[sir-2.1(wt)]</i>  | vector       | 19.0 ± 0.3          | 107     |                                     |                                           |                           |
|                                                                                                                         |                               | <i>ftt-2</i> | 17.1 ± 0.3          | 105     |                                     |                                           |                           |
|                                                                                                                         | <i>pkls1642[sir-2.1(O/E)]</i> | vector       | 20.9 ± 0.4          | 95      | 10 (vs. <i>pkls1641</i> )           |                                           | <0.001 <sup>c</sup>       |
|                                                                                                                         |                               | <i>ftt-2</i> | 16.1 ± 0.3          | 104     |                                     | -6                                        | 0.013 <sup>d</sup>        |
|                                                                                                                         | <i>daf-2(e1370)</i>           | vector       | 26.1 ± 1.0          | 93      | 55 (vs. N2)                         |                                           | <0.001 <sup>a</sup>       |
|                                                                                                                         |                               | <i>ftt-2</i> | 22.6 ± 0.8          | 103     |                                     | 38                                        | <0.001 <sup>b</sup>       |
| <b>Kaplan Meier Analysis - experiments pooled</b>                                                                       |                               |              |                     |         |                                     |                                           |                           |
| Experiment                                                                                                              | Strain                        | RNAi         | Mean LS + SEM(Days) | Total N | % lifespan extension on vector RNAi | % lifespan extension on <i>ftt-2</i> RNAi | p-value vs. control+ RNAi |
| #1, 2 pooled<br>Figure S3A-C                                                                                            | N2                            | vector       | 16.8 ± 0.2          | 207     |                                     |                                           |                           |
|                                                                                                                         |                               | <i>ftt-2</i> | 16.1 ± 0.1          | 208     |                                     |                                           |                           |
|                                                                                                                         | <i>hcf-1(pk924)</i>           | vector       | 18.1 ± 0.2          | 207     | 8 (vs. N2)                          |                                           | <0.001 <sup>a</sup>       |
|                                                                                                                         |                               | <i>ftt-2</i> | 15.6 ± 0.2          | 208     |                                     | -3                                        | 0.139 <sup>b</sup>        |
|                                                                                                                         | <i>pkls1641[sir-2.1(wt)]</i>  | vector       | 18.9 ± 0.2          | 214     |                                     |                                           |                           |
|                                                                                                                         |                               | <i>ftt-2</i> | 16.5 ± 0.2          | 216     |                                     |                                           |                           |
|                                                                                                                         | <i>pkls1642[sir-2.1(O/E)]</i> | vector       | 20.9 ± 0.2          | 202     | 11 (vs. <i>pkls1641</i> )           |                                           | <0.001 <sup>c</sup>       |
|                                                                                                                         |                               | <i>ftt-2</i> | 16.3 ± 0.2          | 216     |                                     | -1                                        | 0.529 <sup>d</sup>        |
|                                                                                                                         | <i>daf-2(e1370)</i>           | vector       | 28.4 ± 0.7          | 198     | 69 (vs. N2)                         |                                           | <0.001 <sup>a</sup>       |
|                                                                                                                         |                               | <i>ftt-2</i> | 24.5 ± 0.7          | 199     |                                     | 50                                        | 0.007 <sup>b</sup>        |

Table S2D

***ftt-2(n4426)* and *hcf-1(pk924)* epistasis analysis in lifespan**

| Experiment | Strain                        | Mean LS + SEM(Days) | Total N | % lifespan extension vs. N2 | % lifespan extension vs. <i>ftt-2(-)</i> | p-value vs. N2 |
|------------|-------------------------------|---------------------|---------|-----------------------------|------------------------------------------|----------------|
| <b>#1</b>  | N2                            | 15.8 ± 0.2          | 107     |                             |                                          |                |
|            | <i>hcf-1(pk924)</i>           | 22.2 ± 0.4          | 105     | 41                          |                                          | <0.001         |
|            | <i>ftt-2(n4426)</i>           | 12.6 ± 0.2          | 100     | -20                         |                                          | <0.001         |
|            | <i>hcf-1(-);ftt-2(-)</i> (#1) | 18.9 ± 0.4          | 94      | 20                          | 50                                       | <0.001         |
|            | <i>hcf-1(-);ftt-2(-)</i> (#2) | 19.2 ± 0.4          | 81      | 22                          | 53                                       | <0.001         |
| <b>#2</b>  | N2                            | 15.1 ± 0.2          | 105     |                             |                                          |                |
|            | <i>hcf-1(pk924)</i>           | 19.8 ± 0.4          | 104     | 31                          |                                          | <0.001         |
|            | <i>ftt-2(n4426)</i>           | 14.2 ± 0.2          | 100     | -6                          |                                          | 0.002          |
|            | <i>hcf-1(-);ftt-2(-)</i> (#1) | 18.8 ± 0.3          | 88      | 24                          | 32                                       | <0.001         |
|            | <i>hcf-1(-);ftt-2(-)</i> (#2) | 19.4 ± 0.4          | 78      | 28                          | 37                                       | <0.001         |

**Kaplan Meier analysis - experiments pooled**

| Experiment         | Strain                   | Mean LS + SEM(Days) | Total N | % lifespan extension vs. N2 | % lifespan extension vs. <i>ftt-2(-)</i> | p-value vs. N2 |
|--------------------|--------------------------|---------------------|---------|-----------------------------|------------------------------------------|----------------|
| <b>#1,2 pooled</b> | N2                       | 15.5 ± 0.1          | 212     |                             |                                          |                |
| <b>Figure S3D</b>  | <i>hcf-1(pk924)</i>      | 21.0 ± 0.3          | 209     | 36                          |                                          | <0.001         |
|                    | <i>ftt-2(n4426)</i>      | 13.4 ± 0.2          | 200     |                             |                                          | <0.001         |
|                    | <i>hcf-1(-);ftt-2(-)</i> | 19.1 ± 0.2          | 341     |                             | 43                                       | <0.001         |
