# Supplementary material for: The Evolutionarily Conserved Longevity Determinants HCF-1 and SIR-2.1/SIRT1 Collaborate to Regulate DAF-16/FOXO
Source: PubMed Central journal article supplement (PMC3164695; doi:10.1371/journal.pgen.1002235), 2011-09-01
Supplement: pgen.1002235.s010.pdf [file pgen.1002235.s010.pdf]

| <b>Table S4A. Enriched GO terms for upregulated genes</b> |                                               |                                                          |                              |                                                      |
|-----------------------------------------------------------|-----------------------------------------------|----------------------------------------------------------|------------------------------|------------------------------------------------------|
| <b>GO terms</b>                                           | <b><i>hcf-1(-) / sir-2.1(O/E) -shared</i></b> | <b><i>hcf-1(-) / sir-2.1(O/E) / daf-2(-) -shared</i></b> | <b><i>daf-2 (-) only</i></b> | <b>Biological process</b>                            |
| Determination of adult lifespan                           | 5.25                                          | 5.83                                                     |                              | Aging                                                |
| Glutathione S-transferase                                 | 2.93                                          | 3.24                                                     |                              | Detoxification                                       |
| Alcohol dehydrogenase                                     | 2.35                                          | 2.52                                                     |                              | Detoxification                                       |
| Short-chain dehydrogenase                                 | 2.20                                          | 2.49                                                     | 2.14                         | Detoxification                                       |
| Cytochrome P450                                           | 2.10                                          | 2.54                                                     |                              | Detoxification                                       |
| Antioxidant/ Oxidoreductase                               | 1.99                                          | 2.20                                                     | 1.73                         | Detoxification                                       |
| Cofactor metabolic process                                | 1.96                                          | 2.37                                                     |                              |                                                      |
| Zinc-finger RING, BBOX                                    | 1.85                                          | 0.99                                                     |                              |                                                      |
| Metal ion binding                                         | 1.72                                          | 1.19                                                     |                              |                                                      |
| Carboxylesterase (type B)                                 | 1.60                                          | 1.65                                                     | 1.02                         | Detoxification                                       |
| Lysosome                                                  | 1.52                                          |                                                          |                              | Detoxification                                       |
| Endopeptidase inhibitor (cysteine, serpin)                | 1.44                                          | 1.66                                                     |                              | Detoxification                                       |
| G-protein signaling inhibitor                             | 1.10                                          |                                                          |                              | Signaling                                            |
| Dauer development                                         |                                               | 1.06                                                     |                              | Development                                          |
| Phenol metabolic process                                  |                                               | 1.05                                                     |                              | Metabolism                                           |
| Collagen / cuticle                                        |                                               |                                                          | 13.44                        |                                                      |
| Glycoprotein/ signaling                                   |                                               |                                                          | 6.27                         | Development: pharyngeal, embryonic, neuronal         |
| Neuropeptide signaling                                    |                                               |                                                          | 2.63                         | Development: pharyngeal                              |
| EF-hand calcium binding (calmodulin)                      |                                               |                                                          | 2.50                         | Development: body morphology, locomotion, egg laying |
| Peptidase/proteolysis                                     |                                               |                                                          | 2.32                         | Metabolism                                           |
| Cytoskeleton organization                                 |                                               |                                                          | 2.12                         |                                                      |
| UDP-glucuronosyl/UDP-glucosyltransferase                  |                                               |                                                          | 1.99                         | Detoxification                                       |
| LIM domain                                                |                                               |                                                          | 1.95                         | Development: muscle, neuron                          |
| Patched / hedgehog receptor                               |                                               |                                                          | 1.85                         | Development : growth, locomotion                     |
| Amino acid metabolism (degradation)                       |                                               |                                                          | 1.70                         | Metabolism                                           |
| EGF-like domain                                           |                                               |                                                          | 1.64                         | Development: growth                                  |
| Organismal growth                                         |                                               |                                                          | 1.53                         |                                                      |
| Anion transport                                           |                                               |                                                          | 1.48                         | Cellular homeostasis                                 |
| Ion homeostasis                                           |                                               |                                                          | 1.13                         | Cellular homeostasis                                 |
| Glycolysis/Gluconeogenesis                                |                                               |                                                          | 1.12                         | Metabolism                                           |
| Sulfur amino acid biosynthesis                            |                                               |                                                          | 1.07                         | Metabolism                                           |
| Intermediate filament                                     |                                               |                                                          | 1.01                         | Development: body morphogenesis                      |

| <b>Table S4B. Enriched GO terms for downregulated genes</b> |                                                   |                                                              |                                  |                                       |
|-------------------------------------------------------------|---------------------------------------------------|--------------------------------------------------------------|----------------------------------|---------------------------------------|
| <b>GO terms</b>                                             | <b><i>hcf-1(-) / sir-2.1(O/E)</i><br/>-shared</b> | <b><i>hcf-1(-) / sir-2.1(O/E) / daf-2(-)</i><br/>-shared</b> | <b><i>daf-2 (-)</i><br/>only</b> | <b>Biological process</b>             |
| Glycoprotein/signaling                                      | 3.95                                              | 3.76                                                         |                                  | Cellular signaling                    |
| Amino acid biosynthesis                                     | 3.14                                              | 1.84                                                         |                                  | Metabolism                            |
| Collagen/cuticle                                            | 3.00                                              |                                                              |                                  |                                       |
| SaposinB                                                    | 2.41                                              |                                                              |                                  | Metabolism: lipid degradation         |
| Acid phosphatase                                            | 2.22                                              | 1.96                                                         |                                  | Metabolism: digestion (lysosomal)     |
| Peptidase (serine)                                          | 2.18                                              |                                                              |                                  | Metabolism: proteolysis (lysosomal)   |
| Determination of adult lifespan                             | 2.15                                              | 2.54                                                         |                                  | Aging                                 |
| Lysozyme                                                    | 1.99                                              | 2.24                                                         |                                  | Immunity                              |
| Ribosomal proteins                                          | 1.80                                              | 2.24                                                         | 9.96                             | Translation                           |
| Fatty acid biosynthesis                                     | 1.60                                              | 1.62                                                         |                                  | Metabolism                            |
| Peptidase/proteolysis (C1)                                  | 1.51                                              | 1.05                                                         |                                  | Metabolism                            |
| UDP-glucuronosyltransferase                                 | 1.50                                              | 1.76                                                         |                                  | Detoxification                        |
| N-acetyltransferase                                         | 1.44                                              |                                                              |                                  | Detoxification                        |
| EGF-like domain                                             | 1.40                                              |                                                              |                                  | Signaling                             |
| C-type lectin                                               | 1.31                                              | 1.00                                                         |                                  | Immunity                              |
| Carboxylesterase (type B)                                   | 1.27                                              |                                                              |                                  | Detoxification                        |
| Peptidase/proteolysis (A1)                                  | 1.19                                              | 1.36                                                         |                                  | Metabolism                            |
| Iron/sulphur/FAD binding                                    | 1.18                                              |                                                              |                                  |                                       |
| FAD-binding                                                 | 1.15                                              |                                                              |                                  |                                       |
| Organismal growth (positive)                                | 1.13                                              |                                                              | 14.18                            |                                       |
| Peptidase/proteolysis                                       |                                                   | 1.57                                                         |                                  |                                       |
| Metal ion transport/binding                                 |                                                   | 1.08                                                         |                                  |                                       |
| Larval development                                          |                                                   |                                                              | 20.93                            | Development                           |
| Hermaphrodite genitalia devel.                              |                                                   |                                                              | 7.89                             | Development                           |
| Mitochondrial                                               |                                                   |                                                              | 6.47                             | Protein translation/transport         |
| Translation initiation                                      |                                                   |                                                              | 4.67                             | Protein biosynthesis                  |
| Protein folding/UPR(Chaperone)                              |                                                   |                                                              | 4.54                             | Protein homeostasis                   |
| Aminoacyl-tRNA synthetase                                   |                                                   |                                                              | 4.25                             | Protein biosynthesis                  |
| Protein transport                                           |                                                   |                                                              | 4.07                             | Vesicular biogenesis/transport        |
| Endomembrane system                                         |                                                   |                                                              | 3.59                             | Protein transport: ER, Golgi, nuclear |
| Protein targeting/mitochondria                              |                                                   |                                                              | 2.99                             | Protein transport                     |
| Organelle lumen                                             |                                                   |                                                              | 2.94                             |                                       |
| WD40 repeat                                                 |                                                   |                                                              | 2.77                             |                                       |
| RNA polymerase                                              |                                                   |                                                              | 2.49                             | Transcription                         |
| Nuclear pore complex                                        |                                                   |                                                              | 2.42                             | Nuclear transport                     |
| Proteasome core complex                                     |                                                   |                                                              | 2.33                             | Protein degradation                   |
| Small ribonucleoprotein                                     |                                                   |                                                              | 2.18                             | RNA splicing/degradation. Development |
| Chromatin/Histones                                          |                                                   |                                                              | 2.18                             | Chromatin structure/DNA replication   |
| Proteasome component                                        |                                                   |                                                              | 1.95                             | Protein degradation                   |
| Organismal growth (negative)                                |                                                   |                                                              | 1.95                             |                                       |
| Golgi apparatus                                             |                                                   |                                                              | 1.88                             | Vesicle /transport                    |
| Chaperones                                                  |                                                   |                                                              | 1.77                             | Protein folding                       |
| Tetratricopeptide repeat                                    |                                                   |                                                              | 1.69                             | Embryonic development                 |
| RNA metabolism/processing                                   |                                                   |                                                              | 1.68                             | RNA Splicing                          |
| Ubq-dependent proteolysis                                   |                                                   |                                                              | 1.58                             | Protein degradation                   |
| Nuclear migration                                           |                                                   |                                                              | 1.40                             | Mitosis / cytokinesis                 |
| Cell division                                               |                                                   |                                                              | 1.39                             |                                       |
| Ubiquitin-ligase                                            |                                                   |                                                              | 1.38                             | Protein degradation                   |
| Embryonic development                                       |                                                   |                                                              | 1.32                             |                                       |
| Heat shock protein DnaJ                                     |                                                   |                                                              | 1.30                             | UPR, protein homeostasis              |
| Axon/ neuron projection                                     |                                                   |                                                              | 1.26                             | Development                           |
| RNA-recognition motif                                       |                                                   |                                                              | 1.24                             | RNA processing                        |
| Cell division/cyclins                                       |                                                   |                                                              | 1.23                             |                                       |
| cis-trans isomerase                                         |                                                   |                                                              | 1.18                             | Protein folding/ immunity             |
| Signal peptide processing                                   |                                                   |                                                              | 1.15                             | Protein processing / maturation       |
| AAA+ ABC transporter                                        |                                                   |                                                              | 1.08                             | Detoxifications                       |

| Table S4C. Enriched promoter regulatory motifs.                      |                       |                                               |                       |                                                                                                                                           |
|----------------------------------------------------------------------|-----------------------|-----------------------------------------------|-----------------------|-------------------------------------------------------------------------------------------------------------------------------------------|
| <i>hcf-1(-) / sir-2.1(O/E) / daf-2(-)</i> – shared genes (693 genes) |                       | <i>daf-2(-)</i> – specific genes (1750 genes) |                       | Known consensus transcription factor binding site                                                                                         |
| Motif                                                                | % of genes with motif | Motif                                         | % of genes with motif |                                                                                                                                           |
|                                                                      | 48%                   |                                               | 70%                   | Mammalian SP1<br>p-value<0.001                                                                                                            |
|                                                                      | 45%                   |                                               | 66%                   | Mammalian Fhl<br>p-value<0.001                                                                                                            |
|                                                                      | 16%                   |                                               | 13%                   |                                                                                                                                           |
|                                                                      | 68%                   |                                               | 87%                   | Mammalian Oct-1<br>p-value<0.001                                                                                                          |
|                                                                      | 68%                   |                                               | 42%                   |                                                                                                                                           |
|                                                                      | 54%                   | Not enriched                                  |                       | (1) Mammalian GATA ( <i>C. elegans elt-3,5,6</i> ) p-value<0.0001<br><br>(2) Mammalian Evi-1 ( <i>C. elegans egl-43</i> ), p-value<0.0001 |
|                                                                      | 10%                   | Not enriched                                  |                       |                                                                                                                                           |
| Not enriched                                                         |                       |                                               | 10%                   |                                                                                                                                           |
| DBE: T(G/A)TTTAC <sup>d</sup>                                        | 51%                   | DBE: T(G/A)TTTAC <sup>d</sup>                 | 45%                   |                                                                                                                                           |
