# Supplementary material for: The Evolutionarily Conserved Longevity Determinants HCF-1 and SIR-2.1/SIRT1 Collaborate to Regulate DAF-16/FOXO
Source: PLoS Genet. 2011 Sep 1;7(9):e1002235. doi: 10.1371/journal.pgen.1002235 (PMC3164695; doi:10.1371/journal.pgen.1002235)
Supplement: Table S3 — List of genes significantly changed in the microarray analyses. (XLS) [file pgen.1002235.s009.xls]

## Sheet: Table S3
Table S3. Genes significantly changed in SAM analyses
UP=Upregulated		Colors: Pink=upregulated, Blue=downregulated, Grey=No Change
DOWN=Downregulated
NC=No change
Notes	Gene name	Sequence name	Worm Base ID	Status
				hcf-1(-)	sir-2.1(O/E)	daf-2(-)
DAF-16 target genes similarly regulated by hcf-1(-), sir-2.1(O/E), daf-2(-)	F21F3.3	F21F3.3	WBGene00017673	UP	UP	UP
	C54F6.5	C54F6.5	WBGene00016923
	Y47G7B.2	Y47G7B.2	WBGene00021654
	ZC412.3	ZC412.3	WBGene00013884
	W05G11.6	W05G11.6	WBGene00021043
	daf-16	R13H8.1	WBGene00000912
	H11E01.2	H11E01.2	WBGene00019187
	clec-222	C03E10.6	WBGene00007283
	B0564.3	B0564.3	WBGene00007203
	far-3	F15B9.1	WBGene00001387
	nhr-62	Y67A6A.2	WBGene00003652
	sel-8	C32A3.1	WBGene00004765
	Y39B6A.1	Y39B6A.1	WBGene00012664
	C05D11.5	C05D11.5	WBGene00015483
	F41C3.1	F41C3.1	WBGene00018267
	cyp-25A2	C36A4.2	WBGene00007964
	F25C8.4	F25C8.4	WBGene00009106
	cyp-34A9	B0213.15	WBGene00015044
	Y20C6A.1	Y20C6A.1	WBGene00012491
	sod-3	C08A9.1	WBGene00004932
	dhs-9	Y32H12A.3	WBGene00000973
	T12D8.5	T12D8.5	WBGene00011733
	F45D11.15	F45D11.15	WBGene00018460
	Y6G8.2	Y6G8.2	WBGene00012404
	F41E6.5	F41E6.5	WBGene00018286
	glb-1	ZK637.13	WBGene00014030
	lys-7	C02A12.4	WBGene00003096
	bcmo-2	F53C3.12	WBGene00018755
	Y9C9A.16	Y9C9A.16	WBGene00021183
	sodh-1	K12G11.3	WBGene00010790
	F21C10.10	F21C10.10	WBGene00017659
	T04A11.5	T04A11.5	WBGene00011420
	far-7	K01A2.2	WBGene00001391
	F43G6.11	F43G6.11	WBGene00009663
	gst-39	Y53F4B.33	WBGene00001787
	akt-2	F28H6.1	WBGene00000103
	R03G5.5	R03G5.5	WBGene00019846
	F57B10.9	F57B10.9	WBGene00019006
	ZC395.5	ZC395.5	WBGene00022597
	T05H4.15	T05H4.15	WBGene00020276
	ftn-1	C54F6.14	WBGene00001500
	M60.4	M60.4	WBGene00019780
	W01A11.1	W01A11.1	WBGene00020909
	K08H10.2	K08H10.2	WBGene00010695
	lea-1	K08H10.1	WBGene00002263
	fbxa-27	Y82E9BL.17	WBGene00022333
	dod-3	C24B9.9	WBGene00016052
	C30F12.7	C30F12.7	WBGene00016266
	acs-17	C46F4.2	WBGene00016716
	T01B6.3	T01B6.3	WBGene00020135
	ZC410.5	ZC410.5	WBGene00013882
	F15E6.3	F15E6.3	WBGene00017484
	btb-16	F39E9.2	WBGene00018195
	nnt-1	C15H9.1	WBGene00003778
	mtl-1	K11G9.6	WBGene00003473
	T08G11.1	T08G11.1	WBGene00011629
	clec-52	B0218.8	WBGene00015052
	fbxa-26	Y82E9BL.7	WBGene00022324
	akt-2	F28H6.1	WBGene00000103
	srp-3	Y32G9A.4	WBGene00005644
	D1086.1	D1086.1	WBGene00008388
	ZC204.12	ZC204.12	WBGene00022562
	btb-17	F39E9.11	WBGene00018200
	far-7	K01A2.2	WBGene00001391
	F43G6.11	F43G6.11	WBGene00009663
	ttr-5	C40H1.5	WBGene00008040
	M01F1.4	M01F1.4	WBGene00010810
	hil-1	C30G7.1	WBGene00001852
	ist-1	C54D1.3	WBGene00002163
	F22B7.9	F22B7.9	WBGene00017698
	C32E8.3	C32E8.3	WBGene00016321
	R04B5.5	R04B5.5	WBGene00011003
	F58A6.1	F58A6.1	WBGene00019022
	gst-20	Y48E1B.10	WBGene00001768
	F41E7.1	F41E7.1	WBGene00009617
	F26D11.1	F26D11.1	WBGene00017818
	C24B5.4	C24B5.4	WBGene00016046
	Y95B8A.6	Y95B8A.6	WBGene00022386
	gst-29	Y53F4B.32	WBGene00001777
	cpi-1	K08B4.6	WBGene00000535
	C44E12.1	C44E12.1	WBGene00016657
	K07C11.4	K07C11.4	WBGene00019477
	B0238.1	B0238.1	WBGene00015067
	srsx-34	C25E10.3	WBGene00016093
	ZC412.4	ZC412.4	WBGene00013885
	C01C10.2	C01C10.2	WBGene00015294
	lec-5	ZK1248.16	WBGene00002268
	pccb-1	F52E4.1	WBGene00018701
	C37H5.2	C37H5.2	WBGene00016506
	alh-5	T08B1.3	WBGene00000111
	sdz-24	K07E8.3	WBGene00019495
	ges-1	R12A1.4	WBGene00001578
	Y48A6B.9	Y48A6B.9	WBGene00012970
	C39E9.8	C39E9.8	WBGene00008032
	ZC204.13	ZC204.13	WBGene00022563
	Y105C5A.8	Y105C5A.8	WBGene00013633
	C52A10.2	C52A10.2	WBGene00016863
	ech-8	F01G10.2	WBGene00001157
	ctl-1	Y54G11A.6	WBGene00000830
	Y48G1A.2	Y48G1A.2	WBGene00021658
	F45D11.2	F45D11.2	WBGene00018449
	tps-1	ZK54.2	WBGene00006602
	K02A6.3	K02A6.3	WBGene00019294
	uvt-3	C42D8.3	WBGene00006862
	fipr-23	C37A5.4	WBGene00007990
	T10D4.3	T10D4.3	WBGene00020407
	bath-26	T07H3.6	WBGene00020329
	T28F4.6	T28F4.6	WBGene00012141
	T03E6.8	T03E6.8	WBGene00011397
	C01B12.3	C01B12.3	WBGene00015286
	gst-5	R03D7.6	WBGene00001753
	fbxa-98	C08F11.5	WBGene00007453
	F32A5.4	F32A5.4	WBGene00017970
	Y54G2A.36	Y54G2A.36	WBGene00021898
	C01A2.2	C01A2.2	WBGene00007214
	C27H5.2	C27H5.2	WBGene00016172
	Y38C1AA.6	Y38C1AA.6	WBGene00021397
	math-36	R52.8	WBGene00020079
	C27H5.2	C27H5.2	WBGene00016172
	E01A2.10	E01A2.10	WBGene00077701
	F32A5.4	F32A5.4	WBGene00017970
	ZK632.10	ZK632.10	WBGene00014017
	gei-7	C05E4.9	WBGene00001564
	Y34F4.4	Y34F4.4	WBGene00021339
	K08E4.3	K08E4.3	WBGene00010667
	unc-84	F54B11.3	WBGene00006816
	F46G10.2	F46G10.2	WBGene00009797
	T23B3.2	T23B3.2	WBGene00020710
	C03G6.17	C03G6.17	WBGene00015402
	cpg-3	R06C7.4	WBGene00011063
	ttr-25	Y51A2D.10	WBGene00013078
	spp-2	T08A9.12	WBGene00004987
	sip-1	F43D9.4	WBGene00004798
	M176.8	M176.8	WBGene00010945
	F15A8.6	F15A8.6	WBGene00017478
	ctl-1	Y54G11A.6	WBGene00000830
	C27H5.2	C27H5.2	WBGene00016172
	lbp-1	F40F4.3	WBGene00002253
	aat-1	F27C8.1	WBGene00000002
	C50D2.6	C50D2.6	WBGene00016809
	F45D3.3	F45D3.3	WBGene00009723
	R05H10.1	R05H10.1	WBGene00011042
	F13D11.4	F13D11.4	WBGene00017429
	R53.5	R53.5	WBGene00011274
	hex-1	T14F9.3	WBGene00020509
	T19B10.3	T19B10.3	WBGene00011832
	gei-7	C05E4.9	WBGene00001564
	ins-35	K02E2.4	WBGene00002118
	grd-5	F41E6.2	WBGene00001694
	srp-1	C05E4.3	WBGene00005642
	F25E2.3	F25E2.3	WBGene00017781
	fbxa-189	F47H4.9	WBGene00009840
	lec-4	C44F1.3	WBGene00002267
	dur-1	F25H8.5	WBGene00001113
	T04A6.1	T04A6.1	WBGene00020200
	prx-6	F39G3.7	WBGene00004195
	T04G9.7	T04G9.7	WBGene00020218
	Y38H6A.3	Y38H6A.3	WBGene00012614
	F59A7.2	F59A7.2	WBGene00019090
	T05F1.11	T05F1.11	WBGene00011495
	maa-1	C18D11.2	WBGene00007680
	C05C8.1	C05C8.1	WBGene00015460
	F21C10.11	F21C10.11	WBGene00017660
	clec-223	C03E10.5	WBGene00007282
	H16D19.3	H16D19.3	WBGene00010401
	T07D1.2	T07D1.2	WBGene00020301
	DH11.2	DH11.2	WBGene00008436
	W08A12.2	W08A12.2	WBGene00021079
	F46B6.8	F46B6.8	WBGene00009773
	C50F7.10	C50F7.10	WBGene00016848
	C11G10.1	C11G10.1	WBGene00007525
	K08E4.2	K08E4.2	WBGene00010666
	tat-4	T24H7.5	WBGene00020784
	F47B8.2	F47B8.2	WBGene00009803
	F45D3.4	F45D3.4	WBGene00009724
	Y57A10B.1	Y57A10B.1	WBGene00013273
	F25E5.8	F25E5.8	WBGene00017789
	C35B8.3	C35B8.3	WBGene00016438
	H19N07.3	H19N07.3	WBGene00010407
	F09F7.6	F09F7.6	WBGene00017303
	K11G12.6	K11G12.6	WBGene00019657
	Y110A7A.4	Y110A7A.4	WBGene00022455
	C50F7.5	C50F7.5	WBGene00016845
	H19N07.4	H19N07.4	WBGene00010408
	ZK550.6	ZK550.6	WBGene00014000
	cyp-25A1	C36A4.1	WBGene00007963
	C46C2.2	C46C2.2	WBGene00008110
	C14F11.1	C14F11.1	WBGene00015778
	dhs-2	F55A12.4	WBGene00000966
	acs-2	F28F8.2	WBGene00009221
	F25E5.8	F25E5.8	WBGene00017789
	F38E9.1	F38E9.1	WBGene00018184
	C01G6.7	C01G6.7	WBGene00007228
	ZK682.2	ZK682.2	WBGene00022788
	nhr-112	Y70C5C.6	WBGene00003702
	C33G8.2	C33G8.2	WBGene00016360
	nhr-11	ZC410.1	WBGene00003610
	dhs-2	F55A12.4	WBGene00000966
	F12E12.11	F12E12.11	WBGene00044811
	M18.6	M18.6	WBGene00010891
	F35H12.4	F35H12.4	WBGene00018076
	gst-15	F37B1.4	WBGene00001763
	F43C11.7	F43C11.7	WBGene00018384
	smf-1	K11G12.4	WBGene00004876
	tag-218	K07D4.7	WBGene00019487
	ZK945.4	ZK945.4	WBGene00014166
	ftt-2	F52D10.3	WBGene00001502
	dhs-30	T25G12.7	WBGene00000993
	unc-84	F54B11.3	WBGene00006816
	R11D1.1	R11D1.1	WBGene00011242
	nlp-2	T24D8.5	WBGene00003740
	T05F1.2	T05F1.2	WBGene00011489
	moc-1	T06H11.4	WBGene00003384
	rgs-10	F45B8.2	WBGene00004353
	cyp-37B1	F28G4.1	WBGene00009226
	acs-11	F41C3.3	WBGene00018269
	C15H11.11	C15H11.11	WBGene00007619
	akt-1	C12D8.10	WBGene00000102
	C16E9.2	C16E9.2	WBGene00015866
	dhs-18	C45B11.3	WBGene00000981
	Y46E12BL.3	Y46E12BL.3	WBGene00021596
	inx-9	ZK792.3	WBGene00002131
	Y60A3A.8	Y60A3A.8	WBGene00013359
	dkf-1	W09C5.5	WBGene00012352
	F48F7.6	F48F7.6	WBGene00009851
	E02H4.6	E02H4.6	WBGene00008464
	C41G7.9	C41G7.9	WBGene00077771
	M01H9.3	M01H9.3	WBGene00019719
	C16E9.2	C16E9.2	WBGene00015866
	T25D10.4	T25D10.4	WBGene00020801
	mai-1	K10B3.9	WBGene00003124
	F53C11.3	F53C11.3	WBGene00009973
	F16C3.2	F16C3.2	WBGene00008886
	Y54G2A.11	Y54G2A.11	WBGene00021876
	R04D3.2	R04D3.2	WBGene00011010
	M01H9.3	M01H9.3	WBGene00019719
	F42G2.5	F42G2.5	WBGene00018354
	cyp-32B1	Y5H2B.5	WBGene00021167
	F14H3.6	F14H3.6	WBGene00008825
	T27F7.1	T27F7.1	WBGene00020866
	dhs-30	T25G12.7	WBGene00000993
	C24F3.2	C24F3.2	WBGene00007697
	ZK829.9	ZK829.9	WBGene00014097
	C30G4.7	C30G4.7	WBGene00016272
	Y54G2A.11	Y54G2A.11	WBGene00021876
	cyp-33E3	F42A9.4	WBGene00018333
	mdt-28	W01A8.1	WBGene00007024
	F47B10.9	F47B10.9	WBGene00009820
	C14C6.2	C14C6.2	WBGene00015756
	bir-2	C50B8.2	WBGene00000250
	Y38H6C.17	Y38H6C.17	WBGene00012629
	Y53G8B.2	Y53G8B.2	WBGene00021818
	F21C10.4	F21C10.4	WBGene00017654
	F41C3.2	F41C3.2	WBGene00018268
	VZC374L.1	VZC374L.1	WBGene00012162
	gst-8	F11G11.1	WBGene00001756
	rbg-1	F20D1.6	WBGene00004317
	ftt-2	F52D10.3	WBGene00001502
	C33A12.7	C33A12.7	WBGene00007886
	Y17G7B.10	Y17G7B.10	WBGene00012463
	C06B3.6	C06B3.6	WBGene00007365
	F33D11.9	F33D11.9	WBGene00018006
	W01C9.2	W01C9.2	WBGene00012176
	R148.5	R148.5	WBGene00020104
	R01H10.4	R01H10.4	WBGene00010972
	F15B9.6	F15B9.6	WBGene00008850
	T05H4.15	T05H4.15	WBGene00020276
	C18A11.1	C18A11.1	WBGene00015947
	T10G3.1	T10G3.1	WBGene00011692
	ttr-23	T21C9.8	WBGene00011894
	F38B6.4	F38B6.4	WBGene00018174
	D1086.3	D1086.3	WBGene00008390
	PDB1.1	PDB1.1	WBGene00019803
	sod-5	ZK430.3	WBGene00007036
	T07C12.9	T07C12.9	WBGene00011573
	C07A9.8	C07A9.8	WBGene00007404
	C50H11.1	C50H11.1	WBGene00016849
	spp-18	F27C8.4	WBGene00005003
	bath-20	B0047.1	WBGene00015012
	nhr-79	T26H2.9	WBGene00003669
	pnk-1	C10G11.5	WBGene00004068
	pnk-1	C10G11.5	WBGene00004068
	alh-1	F54D8.3	WBGene00000107
	M02D8.6	M02D8.6	WBGene00019732
	ech-3	F43H9.1	WBGene00001152
	cpi-2	R01B10.1	WBGene00000534
	glt-5	Y53C12A.2	WBGene00001623
	F43E2.7	F43E2.7	WBGene00018395
	mif-1	Y56A3A.3	WBGene00003234
	pef-1	F23H11.8	WBGene00003969
	R11.1	R11.1	WBGene00011226
	F18E9.3	F18E9.3	WBGene00017569
	Y119C1B.5	Y119C1B.5	WBGene00022471
	cyp-33E2	F42A9.5	WBGene00018334
	F36H9.5	F36H9.5	WBGene00018113
	Y22D7AL.9	Y22D7AL.9	WBGene00021247
	nfm-1	F42A10.2	WBGene00003593
	sod-2	F10D11.1	WBGene00004931
	egl-15	F58A3.2	WBGene00001184
	F57C2.4	F57C2.4	WBGene00010196
	T24C2.2	T24C2.2	WBGene00011981
	skr-19	R12H7.3	WBGene00004825
	C33A12.4	C33A12.4	WBGene00007883
	fbxa-94	F28F8.8	WBGene00009225
	R148.5	R148.5	WBGene00020104
	srr-3	F36D3.3	WBGene00005654
	C11E4.7	C11E4.7	WBGene00007521
	F15B9.10	F15B9.10	WBGene00045418
	Y57G11B.5	Y57G11B.5	WBGene00013297
	tag-253	C37C3.8	WBGene00016500
	cle-1	C36B1.1	WBGene00000527
	C48B4.7	C48B4.7	WBGene00008170
	T19A6.4	T19A6.4	WBGene00011829
	ppt-1	F44C4.5	WBGene00004092
	tag-178	B0495.10	WBGene00007044
	K08F8.1	K08F8.1	WBGene00010681
	F55D12.1	F55D12.1	WBGene00010110
	gob-1	H13N06.3	WBGene00001649
	glod-4	C16C10.10	WBGene00006448
	T04H1.5	T04H1.5	WBGene00011451
	C30G4.4	C30G4.4	WBGene00016269
	F08A8.3	F08A8.3	WBGene00008566
	T25E12.5	T25E12.5	WBGene00012020
	C08F11.12	C08F11.12	WBGene00007459
	tbh-1	H13N06.6	WBGene00006541
	F53G12.13	F53G12.13	WBGene00045049
	M116.2	M116.2	WBGene00019789
	K07D4.9	K07D4.9	WBGene00019488
	T04D3.8	T04D3.8	WBGene00011435
	Y38F1A.2	Y38F1A.2	WBGene00012606
	bath-36	Y75B12B.4	WBGene00013569
	tag-196	F41E6.6	WBGene00007055
	ZK1307.1	ZK1307.1	WBGene00014244
	Y73B6BL.27	Y73B6BL.27	WBGene00022248
	gst-7	F11G11.2	WBGene00001755
	prx-1	C11H1.4	WBGene00004191
	C26B9.1	C26B9.1	WBGene00016131
	gur-5	ZK622.2	WBGene00001806
	E02A10.4	E02A10.4	WBGene00008454
	W02H5.8	W02H5.8	WBGene00020962
	T08E11.8	T08E11.8	WBGene00020364
	F11E6.1	F11E6.1	WBGene00008706
	T07G12.5	T07G12.5	WBGene00011596
	F43E2.7	F43E2.7	WBGene00018395
	cpg-2	B0280.5	WBGene00015102
	K10C8.3	K10C8.3	WBGene00010736
	D1022.3	D1022.3	WBGene00017022
	stdh-1	C06B3.4	WBGene00007363
	snt-1	F31E8.2	WBGene00004921
	W02D7.5	W02D7.5	WBGene00020941
	gst-4	K08F4.7	WBGene00001752
	T10B10.4	T10B10.4	WBGene00011681
	C35C5.8	C35C5.8	WBGene00007957
	nhr-120	C25B8.6	WBGene00003710
	cyp-42A1	Y80D3A.5	WBGene00013585
	K02D7.1	K02D7.1	WBGene00019298
	T12G3.1	T12G3.1	WBGene00011737
	mce-1	D2030.5	WBGene00008415
	C05D9.9	C05D9.9	WBGene00015476
	atg-2	M03A8.2	WBGene00019748
	ent-1	ZK809.4	WBGene00001320
	syn-2	F48F7.2	WBGene00006372
	C06A6.5	C06A6.5	WBGene00015510
	C39F7.2	C39F7.2	WBGene00016539
	ZK863.8	ZK863.8	WBGene00014125
	gstk-1	ZK1320.1	WBGene00014251
	C36E8.4	C36E8.4	WBGene00007983
	C37H5.13	C37H5.13	WBGene00016511
	K02A2.1	K02A2.1	WBGene00019288
	gstk-2	D2024.7	WBGene00017054
	nsy-1	F59A6.1	WBGene00003822
	cutl-24	Y38C1AA.5	WBGene00021396
	F11E6.1	F11E6.1	WBGene00008706
	R12C12.5	R12C12.5	WBGene00020025
	pef-1	F23H11.8	WBGene00003969
	B0284.3	B0284.3	WBGene00007133
	C32D5.7	C32D5.7	WBGene00016315
	F16B4.2	F16B4.2	WBGene00017504
	fipr-16	C06E1.6	WBGene00015521
	F27D9.2	F27D9.2	WBGene00017861
	K07C11.3	K07C11.3	WBGene00019476
	cpi-2	R01B10.1	WBGene00000534
	F45E10.2	F45E10.2	WBGene00009729
	ZC443.4	ZC443.4	WBGene00013899
	C34D1.4	C34D1.4	WBGene00007931
	T10H10.2	T10H10.2	WBGene00020426
	Y52B11A.8	Y52B11A.8	WBGene00013127
	pqn-24	D1007.14	WBGene00004113
	C36F7.2	C36F7.2	WBGene00007985
	F54F3.4	F54F3.4	WBGene00010063
	nekl-3	F19H6.1	WBGene00008956
	C34C6.7	C34C6.7	WBGene00007919
	Y22D7AR.6	Y22D7AR.6	WBGene00021260
	K07E3.4	K07E3.4	WBGene00019492
	Y45F10A.3	Y45F10A.3	WBGene00012866
	ZC443.3	ZC443.3	WBGene00013898
	T20B3.1	T20B3.1	WBGene00011850
	inx-11	W04D2.3	WBGene00002133
	lst-2	R160.7	WBGene00003084
	C01B10.10	C01B10.10	WBGene00015284
	lgg-1	C32D5.9	WBGene00002980
	T06E6.10	T06E6.10	WBGene00011540
	dgk-2	F46H6.2	WBGene00000959
	fbxa-95	F28F8.4	WBGene00009222
	C10G6.1	C10G6.1	WBGene00015680
	vem-1	K07E3.8	WBGene00006890
	D1044.1	D1044.1	WBGene00017027	DOWN	DOWN	DOWN
	C36C5.5	C36C5.5	WBGene00016474
	C10C5.4	C10C5.4	WBGene00007508
	C44F1.1	C44F1.1	WBGene00008091
	Y73F8A.11	Y73F8A.11	WBGene00013520
	F53E10.4	F53E10.4	WBGene00018760
	ugt-7	C13D9.9	WBGene00015739
	Y39B6A.21	Y39B6A.21	WBGene00012680
	T24A6.20	T24A6.20	WBGene00020756
	gpdh-1	F47G4.3	WBGene00009824
	F42A10.7	F42A10.7	WBGene00018343
	F22B8.6	F22B8.6	WBGene00009048
	F55B11.1	F55B11.1	WBGene00010083
	W02B12.1	W02B12.1	WBGene00012201
	ugt-48	C18C4.3	WBGene00015965
	C32H11.4	C32H11.4	WBGene00007867
	C32H11.3	C32H11.3	WBGene00007866
	ugt-53	T03D3.1	WBGene00020182
	aat-6	T11F9.4	WBGene00000007
	cln-3.1	F07B10.1	WBGene00000539
	Y39B6A.24	Y39B6A.24	WBGene00012683
	C43D7.4	C43D7.4	WBGene00008067
	aqp-4	F40F9.9	WBGene00000172
	F22E5.1	F22E5.1	WBGene00017703
	clec-205	Y46H3B.1	WBGene00021602
	clec-170	F38A1.1	WBGene00009515
	F54F11.2	F54F11.2	WBGene00010070
	clec-143	ZK673.9	WBGene00014063
	F28H7.3	F28H7.3	WBGene00009237
	K11H12.4	K11H12.4	WBGene00019660
	dct-18	F58G1.4	WBGene00010266
	fbxa-72	F31F4.15	WBGene00017962
	T25G12.6	T25G12.6	WBGene00020813
	T22H6.2	T22H6.2	WBGene00011938
	F08G5.6	F08G5.6	WBGene00008584
	C27H5.4	C27H5.4	WBGene00016174
	F39E9.1	F39E9.1	WBGene00018194
	ilys-2	C45G7.2	WBGene00016669
	C35C5.10	C35C5.10	WBGene00007959
	R03A10.3	R03A10.3	WBGene00010983
	cdd-1	C47D2.2	WBGene00000391
	F19C7.2	F19C7.2	WBGene00017592
	ugt-46	B0310.5	WBGene00015141
	grsp-4	F07C4.7	WBGene00017201
	C05D12.4	C05D12.4	WBGene00007341
	ZC416.6	ZC416.6	WBGene00022610
	nuc-1	C07B5.5	WBGene00003828
	dpyd-1	C25F6.3	WBGene00016103
	T01C8.3	T01C8.3	WBGene00020144
	tig-3	Y46E12BL.1	WBGene00021594
	C49G9.1	C49G9.1	WBGene00008216
	F35E12.5	F35E12.5	WBGene00009429
	W03D8.8	W03D8.8	WBGene00020989
	cutl-18	F47G9.3	WBGene00009830
	F07H5.9	F07H5.9	WBGene00008560
	ilys-5	F22A3.6	WBGene00017691
	oac-20	F36G9.12	WBGene00009488
	K07F5.8	K07F5.8	WBGene00010636
	F19C7.4	F19C7.4	WBGene00017594
	C18H9.6	C18H9.6	WBGene00016004
	pgp-7	T21E8.2	WBGene00004001
	R07C12.2	R07C12.2	WBGene00019932
	C44C1.5	C44C1.5	WBGene00016644
	ptr-24	F46G10.5	WBGene00004238
	aat-4	T13A10.10	WBGene00000005
	str-146	F58G4.6	WBGene00006193
	F53F1.4	F53F1.4	WBGene00009982
	F58G6.3	F58G6.3	WBGene00010274
	pgp-7	T21E8.2	WBGene00004001
	ndg-4	F56F3.2	WBGene00003577
	C42C1.7	C42C1.7	WBGene00016585
	Y46G5A.19	Y46G5A.19	WBGene00012909
	clec-204	Y46H3B.2	WBGene00021603
	Y48A6B.7	Y48A6B.7	WBGene00012968
	ugt-29	Y49C4A.8	WBGene00021709
	clec-210	Y73C8C.2	WBGene00022261
	F43C1.5	F43C1.5	WBGene00009649
	fpn-1.1	Y37E3.16	WBGene00021354
	aqp-11	ZK525.2	WBGene00000179
	vha-8	C17H12.14	WBGene00006917
	K01C8.1	K01C8.1	WBGene00010456
	Y54F10AM.8	Y54F10AM.8	WBGene00021852
	col-43	ZC513.8	WBGene00000620
	F12B6.2	F12B6.2	WBGene00017398
	F58G6.7	F58G6.7	WBGene00010277
	F35E12.9	F35E12.9	WBGene00009433
	C49C3.9	C49C3.9	WBGene00008199
	F53H8.3	F53H8.3	WBGene00018779
	H20E11.3	H20E11.3	WBGene00019215
	Y55F3C.3	Y55F3C.3	WBGene00021948
	F13B6.2	F13B6.2	WBGene00017417
	R07E3.1	R07E3.1	WBGene00011102
	Y66D12A.13	Y66D12A.13	WBGene00013439
	scpl-1	B0379.4	WBGene00007054
	C31H5.6	C31H5.6	WBGene00007857
	dct-11	W06B11.3	WBGene00021060
	Y32B12C.1	Y32B12C.1	WBGene00012525
	mec-5	E03G2.3	WBGene00003169
	Y116F11A.6	Y116F11A.6	WBGene00013819
	daf-36	C12D8.5	WBGene00007536
	btb-9	F45C12.4	WBGene00018435
	T20F7.3	T20F7.3	WBGene00020631
	ads-1	Y50D7A.7	WBGene00000081
	ugt-29	Y49C4A.8	WBGene00021709
	tag-320	B0403.4	WBGene00015168
	C17H12.6	C17H12.6	WBGene00015932
	tre-2	T05A12.2	WBGene00006608
	fat-7	F10D2.9	WBGene00001399
	hsp-3	C15H9.6	WBGene00002007
	C46F2.1	C46F2.1	WBGene00016714
	F48B9.2	F48B9.2	WBGene00018588
	Y41C4A.11	Y41C4A.11	WBGene00012757
	M04C9.4	M04C9.4	WBGene00010859
	acs-14	Y76A2B.3	WBGene00013575
	B0280.13	B0280.13	WBGene00015107
	ZK550.2	ZK550.2	WBGene00013996
	cpg-9	Y67D8C.8	WBGene00022072
	H06H21.8	H06H21.8	WBGene00019164
	hpd-1	T21C12.2	WBGene00001993
	K10D11.5	K10D11.5	WBGene00010749
	T04F3.4	T04F3.4	WBGene00011439
	pgp-5	C05A9.1	WBGene00003999
	sgk-1	W10G6.2	WBGene00004789
	K08C7.6	K08C7.6	WBGene00010648
	K07E3.7	K07E3.7	WBGene00019493
	R12C12.1	R12C12.1	WBGene00020022
	nrf-6	C08B11.4	WBGene00003813
	R193.2	R193.2	WBGene00020128
	F32A5.3	F32A5.3	WBGene00017969
	fbxa-193	F59A1.9	WBGene00010295
	H06H21.8	H06H21.8	WBGene00019164
	col-149	B0024.1	WBGene00000722
	F16H6.6	F16H6.6	WBGene00008896
	T05B11.4	T05B11.4	WBGene00020247
	B0545.4	B0545.4	WBGene00015247
	opt-2	K04E7.2	WBGene00003877
	cah-5	R173.1	WBGene00000283
	Y43F8C.13	Y43F8C.13	WBGene00012834
	Y50D4B.6	Y50D4B.6	WBGene00021745
	F44G3.2	F44G3.2	WBGene00009706
	ugt-22	C08F11.8	WBGene00007455
	tag-173	F27D4.5	WBGene00006518
	C18E9.5	C18E9.5	WBGene00007685
	C47A4.2	C47A4.2	WBGene00008123
	dod-23	F49E12.2	WBGene00009898
	C32D5.6	C32D5.6	WBGene00016314
	F14D7.6	F14D7.6	WBGene00008793
	ncx-6	C07A9.4	WBGene00003571
	K07G5.5	K07G5.5	WBGene00010644
	cpt-4	K11D12.4	WBGene00019644
	crn-6	K04H4.6	WBGene00000799
	F42A9.6	F42A9.6	WBGene00018335
	Y39B6A.33	Y39B6A.33	WBGene00012692
	R09D1.11	R09D1.11	WBGene00011167
	dod-24	C32H11.12	WBGene00007875
	F59F5.8	F59F5.8	WBGene00010346
	ins-7	ZK1251.2	WBGene00002090
	E02H1.8	E02H1.8	WBGene00008459
	F13E9.13	F13E9.13	WBGene00044797
	C44B7.2	C44B7.2	WBGene00016624
	rps-30	C26F1.4	WBGene00004499
	math-41	T08E11.4	WBGene00020360
	Y94H6A.12	Y94H6A.12	WBGene00050885
	F25E2.2	F25E2.2	WBGene00017780
	asp-1	Y39B6A.20	WBGene00000214
	Y53G8AR.7	Y53G8AR.7	WBGene00021814
	Y66D12A.9	Y66D12A.9	WBGene00013435
	Y57A10A.27	Y57A10A.27	WBGene00013267
	ilys-3	C45G7.3	WBGene00016670
	F44E2.9	F44E2.9	WBGene00018422
	clec-209	Y19D10A.9	WBGene00021224
	C08G5.5	C08G5.5	WBGene00015617
	T24C4.4	T24C4.4	WBGene00020760
	F11C1.5	F11C1.5	WBGene00008694
	F49F1.6	F49F1.6	WBGene00018646
	T14B4.2	T14B4.2	WBGene00020499
	Y54G2A.3	Y54G2A.3	WBGene00021869
	inf-1	F57B9.6	WBGene00002083
	clec-160	F09G8.8	WBGene00017322
	F21D5.8	F21D5.8	WBGene00009013
	rpl-1	Y71F9AL.13	WBGene00004412
	F13G3.11	F13G3.11	WBGene00008769
	pho-4	T16D1.2	WBGene00004023
	Y54E10A.7	Y54E10A.7	WBGene00021829
	cyp-13A2	T10B9.7	WBGene00011676
	cyp-35A3	K09D9.2	WBGene00019565
	Y22D7AL.10	Y22D7AL.10	WBGene00021248
	B0250.5	B0250.5	WBGene00007122
	rhy-1	W07A12.7	WBGene00012324
	cln-3.3	ZC190.1	WBGene00000541
	C06G4.4	C06G4.4	WBGene00015558
	C43E11.9	C43E11.9	WBGene00016607
	C14C11.4	C14C11.4	WBGene00015768
	T24B8.5	T24B8.5	WBGene00011979
	F23A7.4	F23A7.4	WBGene00009069
	C06B8.2	C06B8.2	WBGene00007368
	F56A8.3	F56A8.3	WBGene00010139
	F13D12.6	F13D12.6	WBGene00008741
	cpr-5	W07B8.5	WBGene00000785
	rpl-20	E04A4.8	WBGene00004432
	K12H4.7	K12H4.7	WBGene00019682
	C53C7.3	C53C7.3	WBGene00008279
	C52E12.6	C52E12.6	WBGene00016890
	oac-54	W07A12.6	WBGene00012323
	T05E12.3	T05E12.3	WBGene00011486
	cdr-1	F35E8.11	WBGene00000412
	F49F1.7	F49F1.7	WBGene00018647
	clh-6	R07B7.1	WBGene00000533
	T03D8.2	T03D8.2	WBGene00011391
	W10D9.5	W10D9.5	WBGene00021133
	Y76G2A.2	Y76G2A.2	WBGene00022305
	ZK1098.7	ZK1098.7	WBGene00014224
	ZK666.2	ZK666.2	WBGene00014042
	F49E12.9	F49E12.9	WBGene00009902
	eif-3.G	F22B5.2	WBGene00001230
	efn-3	F15A2.5	WBGene00001164
	K10D11.2	K10D11.2	WBGene00010746
	F58H7.2	F58H7.2	WBGene00019068
	pho-1	EGAP2.3	WBGene00004020
	ZK228.3	ZK228.3	WBGene00013946
	C01A2.3	C01A2.3	WBGene00007215
	nhr-142	F44E7.8	WBGene00018430
	tag-10	C31C9.1	WBGene00006404
	dod-17	K10D11.1	WBGene00010745
	grd-2	F46B3.5	WBGene00001691
	nac-3	K08E5.2	WBGene00003519
	clec-51	B0218.6	WBGene00015050
	R193.2	R193.2	WBGene00020128
	C49A9.2	C49A9.2	WBGene00016756
	Y39A1A.6	Y39A1A.6	WBGene00012645
	unc-93	C46F11.1	WBGene00006822
	Y106G6H.1	Y106G6H.1	WBGene00013716
	T21B6.2	T21B6.2	WBGene00011879
	ugt-26	C10H11.6	WBGene00015695
	F53E10.5	F53E10.5	WBGene00018761
	F27E5.1	F27E5.1	WBGene00009192
	ttr-1	K03H1.6	WBGene00010541
	C31H2.4	C31H2.4	WBGene00016294
	R03D7.2	R03D7.2	WBGene00010989
	K12H4.3	K12H4.3	WBGene00019678
	T14G10.8	T14G10.8	WBGene00011777
	D1007.15	D1007.15	WBGene00017010
	C03H12.1	C03H12.1	WBGene00007284
	R05H10.2	R05H10.2	WBGene00011043
	C27B7.7	C27B7.7	WBGene00007764
	T10B5.7	T10B5.7	WBGene00020393
	F31F7.1	F31F7.1	WBGene00017964
	F13B12.2	F13B12.2	WBGene00008730
	acl-7	Y46G5A.21	WBGene00012911
	T09B4.8	T09B4.8	WBGene00020382
	C29F7.3	C29F7.3	WBGene00007812
	aqp-10	ZK1321.3	WBGene00000178
	C08H9.2	C08H9.2	WBGene00007463
	C29F3.7	C29F3.7	WBGene00007807
	K12H4.7	K12H4.7	WBGene00019682
	F53F4.11	F53F4.11	WBGene00009993
	spp-17	C54G6.5	WBGene00005002
	F36D1.4	F36D1.4	WBGene00009463
	rps-2	C49H3.11	WBGene00004471
	ZK228.4	ZK228.4	WBGene00013947
	T16G12.1	T16G12.1	WBGene00011803
	B0303.2	B0303.2	WBGene00015124
	C51E3.10	C51E3.10	WBGene00008255
	C01G5.9	C01G5.9	WBGene00015311
	C30C11.4	C30C11.4	WBGene00016250
	F18E2.1	F18E2.1	WBGene00008936
	K08C9.1	K08C9.1	WBGene00010650
	F34H10.1	F34H10.1	WBGene00009378
	C17B7.9	C17B7.9	WBGene00015883
	Y43D4A.4	Y43D4A.4	WBGene00012790
	ugt-30	T01G5.2	WBGene00011340
	ZK742.3	ZK742.3	WBGene00022813
	F59B1.2	F59B1.2	WBGene00019097
	F35C8.5	F35C8.5	WBGene00018036
	amt-4	C05E11.5	WBGene00000136
	F31F7.1	F31F7.1	WBGene00017964
	F31F7.1	F31F7.1	WBGene00017964
	ZK896.4	ZK896.4	WBGene00014135
	F46F5.7	F46F5.7	WBGene00018498
	smf-3	Y69A2AR.4	WBGene00004878
	F55G1.15	F55G1.15	WBGene00018907
	ttr-37	F21E9.3	WBGene00017667
	dsc-4	K02D7.4	WBGene00001099
Genes similar between hcf-1(-) and sir-2.1(O/E), different in daf-2(-)	acl-14	K07B1.5	WBGene00019465	UP	UP	NC
	haf-1	C30H6.6	WBGene00001811
	K09E3.7	K09E3.7	WBGene00019578
	B0336.7	B0336.7	WBGene00015147
	C17E4.2	C17E4.2	WBGene00007642
	nhr-32	K08H2.8	WBGene00003626
	C17E7.4	C17E7.4	WBGene00015899
	nhr-21	F21D12.1	WBGene00003620
	C08A9.6	C08A9.6	WBGene00015586
	C06A5.8	C06A5.8	WBGene00015505
	R09A8.1	R09A8.1	WBGene00011152
	mes-1	F54F7.5	WBGene00003219
	R11F4.1	R11F4.1	WBGene00020007
	nhl-3	W04H10.3	WBGene00003599
	F40B5.1	F40B5.1	WBGene00018225
	ZK1098.3	ZK1098.3	WBGene00014220
	mei-2	F57B10.12	WBGene00003184
	drsh-1	F26E4.10	WBGene00009163
	F35C11.5	F35C11.5	WBGene00009404
	C04A11.2	C04A11.2	WBGene00007286
	R09F10.8	R09F10.8	WBGene00019989
	T01G9.2	T01G9.2	WBGene00011344
	rgs-9	ZC53.7	WBGene00004352
	flh-3	Y11D7A.13	WBGene00012436
	F13E6.3	F13E6.3	WBGene00008747
	F15A4.10	F15A4.10	WBGene00008844
	nhr-19	E02H1.7	WBGene00003618
	C24D10.5	C24D10.5	WBGene00016056
	K09E3.5	K09E3.5	WBGene00019576
	T23G11.7	T23G11.7	WBGene00011972
	D2030.2	D2030.2	WBGene00008412
	T24D1.3	T24D1.3	WBGene00011986
	F21G4.4	F21G4.4	WBGene00009025
	hst-6	Y34B4A.3	WBGene00002031
	mlcd-1	F35G12.1	WBGene00009439
	C05C8.9	C05C8.9	WBGene00015466
	F08F3.6	F08F3.6	WBGene00017263
	C05C10.5	C05C10.5	WBGene00007332
	xbp-1	R74.3	WBGene00006959
	ugt-45	Y37E11AR.5	WBGene00021372
	C25G4.10	C25G4.10	WBGene00007736
	C08A9.8	C08A9.8	WBGene00015588
	T02G6.5	T02G6.5	WBGene00011388
	T23F11.4	T23F11.4	WBGene00011956
	C14C11.7	C14C11.7	WBGene00015769
	tag-96	M01D7.4	WBGene00006461
	C34D10.1	C34D10.1	WBGene00016406
	T01G9.2	T01G9.2	WBGene00011344
	rgs-11	F45B8.1	WBGene00004354
	ekl-5	Y26E6A.1	WBGene00012512
	gpi-1	Y87G2A.8	WBGene00013597
	hnd-1	C44C10.8	WBGene00001981
	F36H2.2	F36H2.2	WBGene00009499
	eor-2	C44H4.7	WBGene00001325
	ctns-1	C41C4.7	WBGene00008052
	F52D10.2	F52D10.2	WBGene00009930
	ZK945.4	ZK945.4	WBGene00014166
	obr-4	C32F10.1	WBGene00016331
	nhr-61	W01D2.2	WBGene00003651
	ttr-50	F58B3.9	WBGene00010234
	clec-88	K10B2.3	WBGene00019606
	frm-4	C24A11.8	WBGene00001491
	seld-1	Y45F10A.4	WBGene00012867
	dct-1	C14F5.1	WBGene00015776
	Y39B6A.42	Y39B6A.42	WBGene00012700	UP	UP	DOWN
	F14D7.2	F14D7.2	WBGene00008789
	Y82E9BR.5	Y82E9BR.5	WBGene00022338	DOWN	DOWN	NC
	K01D12.8	K01D12.8	WBGene00010467
	F07C3.9	F07C3.9	WBGene00017197
	smd-1	F47G4.7	WBGene00004875
	lec-8	R07B1.10	WBGene00002271
	W04A4.6	W04A4.6	WBGene00012235
	F07A5.3	F07A5.3	WBGene00008542
	C33H5.13	C33H5.13	WBGene00016379
	F15E6.6	F15E6.6	WBGene00017487
	act-5	T25C8.2	WBGene00000067
	K03A1.2	K03A1.2	WBGene00019351
	K11D12.5	K11D12.5	WBGene00019645
	F25B4.8	F25B4.8	WBGene00017771
	C45B2.8	C45B2.8	WBGene00016662
	col-111	F29B9.9	WBGene00000685
	bcat-1	K02A4.1	WBGene00001149
	T25C12.3	T25C12.3	WBGene00012018
	Y53F4B.16	Y53F4B.16	WBGene00013162
	E02H9.5	E02H9.5	WBGene00017103
	Y47G6A.19	Y47G6A.19	WBGene00021645
	pcp-1	ZK112.1	WBGene00003956
	C17H12.4	C17H12.4	WBGene00015930
	fip-5	F41E7.4	WBGene00009620
	C42D4.2	C42D4.2	WBGene00016595
	F17C8.7	F17C8.7	WBGene00008912
	W09B7.2	W09B7.2	WBGene00021107
	C45B2.2	C45B2.2	WBGene00016659
	Y57A10A.23	Y57A10A.23	WBGene00013263
	spp-4	T08A9.8	WBGene00004989
	F26C11.1	F26C11.1	WBGene00009146
	C15C7.5	C15C7.5	WBGene00015791
	fbxa-156	C06H5.1	WBGene00007392
	C23H4.4	C23H4.4	WBGene00007693
	F36G3.2	F36G3.2	WBGene00009483
	C25E10.10	C25E10.10	WBGene00016099
	spp-5	T08A9.9	WBGene00004990
	Y65B4BR.1	Y65B4BR.1	WBGene00022040
	Y45F10C.4	Y45F10C.4	WBGene00012880
	cpz-1	F32B5.8	WBGene00000788
	fipr-21	F41E7.5	WBGene00009621
	col-167	T10E10.2	WBGene00000740
	F35E12.10	F35E12.10	WBGene00009434
	epi-1	K08C7.3	WBGene00001328
	col-75	K03H9.2	WBGene00000651
	F08F3.4	F08F3.4	WBGene00017262
	bas-1	C05D2.4	WBGene00000239
	hsp-12.1	T22A3.2	WBGene00011906
	pbo-5	Y44A6E.1	WBGene00012857
	ZK484.6	ZK484.6	WBGene00022752
	mtl-2	T08G5.10	WBGene00003474
	T11B7.2	T11B7.2	WBGene00011707
	R04E5.2	R04E5.2	WBGene00019869
	Y71H2AL.1	Y71H2AL.1	WBGene00022164
	mrp-3	E03G2.2	WBGene00003409
	him-4	F15G9.4	WBGene00001863
	T13F3.6	T13F3.6	WBGene00011753
	F21A10.1	F21A10.1	WBGene00008998
	F22E12.1	F22E12.1	WBGene00009058
	T05B11.1	T05B11.1	WBGene00020245
	F28B4.3	F28B4.3	WBGene00017892
	F55E10.6	F55E10.6	WBGene00018885
	F35C11.4	F35C11.4	WBGene00009403
	ttr-31	F58A3.5	WBGene00010225
	ckc-1	T27A10.3	WBGene00000515
	cpt-5	F09F3.9	WBGene00008629
	F53C11.1	F53C11.1	WBGene00009971
	C03F11.3	C03F11.3	WBGene00015389
	math-22	C46F9.1	WBGene00016717
	C45B2.1	C45B2.1	WBGene00016658
	spp-14	K09F5.3	WBGene00004999
	col-168	T10E10.1	WBGene00000741
	cnc-2	R09B5.3	WBGene00000556
	F22H10.3	F22H10.3	WBGene00017727
	T16G12.4	T16G12.4	WBGene00011805
	F22F7.7	F22F7.7	WBGene00017724
	hrg-4	F36H1.5	WBGene00009493
	col-180	C44C10.1	WBGene00000753
	B0222.5	B0222.5	WBGene00015056
	C26C6.9	C26C6.9	WBGene00007743
	T12D8.9	T12D8.9	WBGene00011736
	T04B2.3	T04B2.3	WBGene00011422
	ver-2	T17A3.8	WBGene00006895
	F58F9.4	F58F9.4	WBGene00019058
	T18D3.3	T18D3.3	WBGene00011821
	T25B9.1	T25B9.1	WBGene00012007
	ceh-48	C17H12.9	WBGene00015934
	B0252.3	B0252.3	WBGene00015088
	btb-14	Y57A10B.3	WBGene00013275
	col-159	F57B1.3	WBGene00000732
	C35B1.4	C35B1.4	WBGene00016434
	sid-2	ZK520.2	WBGene00004796
	C28G1.5	C28G1.5	WBGene00016190
	ZK1127.10	ZK1127.10	WBGene00022856
	C03A7.12	C03A7.12	WBGene00015370
	lact-1	F46H5.8	WBGene00018523	DOWN	DOWN	UP
	T25B6.2	T25B6.2	WBGene00020788
	grd-14	T01B10.2	WBGene00001703
	col-77	M195.1	WBGene00000653
	col-165	F14H12.1	WBGene00000738
	col-92	W05B2.6	WBGene00000667
	pcp-3	F23B2.11	WBGene00003958
	asm-2	ZK455.4	WBGene00000212
	col-85	T21B4.2	WBGene00000660
	col-93	W05B2.5	WBGene00000668
	nex-3	C28A5.3	WBGene00003590
	R07E3.4	R07E3.4	WBGene00011105
Genes similar between hcf-1(-) and daf-2(-), different in sir-2.1(O/E)	C02F12.5	C02F12.5	WBGene00015355	UP	NC	UP
	C53B7.3	C53B7.3	WBGene00016894
	tag-24	F14D12.6	WBGene00006411
	W10G11.19	W10G11.19	WBGene00021148
	Y45F10D.6	Y45F10D.6	WBGene00012886
	C55A6.3	C55A6.3	WBGene00008332
	T04A6.1	T04A6.1	WBGene00020200
	fbxa-6	cTel54X.1	WBGene00008352
	clec-145	Y48E1B.16	WBGene00013013
	Y4C6B.2	Y4C6B.2	WBGene00021156
	F21D12.3	F21D12.3	WBGene00017663
	Y4C6B.7	Y4C6B.7	WBGene00021161
	E04F6.9	E04F6.9	WBGene00017128
	nhr-74	C27C7.3	WBGene00003664	UP	DOWN	UP
	scrm-4	F11A6.2	WBGene00008681
	B0511.11	B0511.11	WBGene00015236
	R09B5.11	R09B5.11	WBGene00019979
	flp-27	C25H3.5	WBGene00016114
	scrm-2	ZK1053.5	WBGene00014200
	ttr-6	T28B4.3	WBGene00020886
	F52E4.5	F52E4.5	WBGene00018702
	R11D1.3	R11D1.3	WBGene00011244
	ssu-1	Y113G7A.11	WBGene00013748	DOWN	UP	DOWN
	F09C8.1	F09C8.1	WBGene00008621
	haf-6	Y48G8AL.11	WBGene00001816
	C29F7.2	C29F7.2	WBGene00007811
Genes similar between sir-2.1(O/E) and daf-2(-), different in hcf-1(-)	fat-5	W06D12.3	WBGene00001397	NC	UP	UP
	T04A11.1	T04A11.1	WBGene00011416
	F54F3.3	F54F3.3	WBGene00010062
	C35C5.8	C35C5.8	WBGene00007957
	daf-16	R13H8.1	WBGene00000912
	C05C8.7	C05C8.7	WBGene00015464
	ZK688.2	ZK688.2	WBGene00022797
	K11G9.5	K11G9.5	WBGene00019655
	fmo-3	Y39A1A.19	WBGene00001478
	sqrd-1	F02H6.5	WBGene00008538
	F44A2.3	F44A2.3	WBGene00018403
	K03H6.2	K03H6.2	WBGene00019368
	T10G3.3	T10G3.3	WBGene00011694
	R08E5.3	R08E5.3	WBGene00019963
	F45D11.1	F45D11.1	WBGene00018448
	C18A11.3	C18A11.3	WBGene00015949
	F46F2.5	F46F2.5	WBGene00009789
	K11G9.2	K11G9.2	WBGene00019653
	Y38C1AB.1	Y38C1AB.1	WBGene00021403
	F11F1.2	F11F1.2	WBGene00008715
	Y40B10A.2	Y40B10A.2	WBGene00021487
	F48D6.4	F48D6.4	WBGene00018602
	M04D5.3	M04D5.3	WBGene00077770
	B0361.9	B0361.9	WBGene00015163
	T25D3.3	T25D3.3	WBGene00020797
	C48E7.11	C48E7.11	WBGene00016754
	fbxa-78	Y119D3B.19	WBGene00022495
	C12D12.5	C12D12.5	WBGene00015716
	C04E12.4	C04E12.4	WBGene00015434
	ZK593.1	ZK593.1	WBGene00014001
	K09C4.5	K09C4.5	WBGene00019550	DOWN	UP	UP
	C13C4.6	C13C4.6	WBGene00007550
	F28A12.4	F28A12.4	WBGene00017881
	ugt-4	ZC455.5	WBGene00013905	NC	DOWN	DOWN
	C10C5.3	C10C5.3	WBGene00007507
	M88.4	M88.4	WBGene00010907
	D1086.5	D1086.5	WBGene00008392
	C10C5.5	C10C5.5	WBGene00007509
	F35F10.13	F35F10.13	WBGene00018062
	F34D10.7	F34D10.7	WBGene00009376
	F55G11.8	F55G11.8	WBGene00010128
	nhr-137	C56E10.4	WBGene00003727
	dhs-25	F09E10.3	WBGene00000988
	T20F7.1	T20F7.1	WBGene00020630
	clec-265	M02F4.7	WBGene00019738
	clec-4	Y38E10A.5	WBGene00012583	UP	DOWN	DOWN
Genes opposite between sir-2.1(O/E) and daf-2(-)	nhr-73	C27C7.4	WBGene00003663	NC	DOWN	UP
	cpr-3	T10H4.12	WBGene00000783
	Y18D10A.23	Y18D10A.23	WBGene00012487
	F28H7.8	F28H7.8	WBGene00009241
Genes opposite between sir-2.1(O/E) and hcf-1(-)	T28A11.19	T28A11.19	WBGene00020881	UP	DOWN	NC
	T28A11.2	T28A11.2	WBGene00020869
	col-110	F19C7.7	WBGene00000684
	F21H7.3	F21H7.3	WBGene00009029
	T11B7.5	T11B7.5	WBGene00011708
	unc-119	M142.1	WBGene00006843
	W10G11.2	W10G11.2	WBGene00021135
	T20D4.11	T20D4.11	WBGene00020617
	F22D3.6	F22D3.6	WBGene00017702
	flp-8	F31F6.4	WBGene00001451
	C05D10.4	C05D10.4	WBGene00015480
	C49G7.12	C49G7.12	WBGene00077593
	flp-17	C52D10.11	WBGene00001460
	scl-3	F49E11.11	WBGene00009896
	Y54G2A.10	Y54G2A.10	WBGene00021875
	W10G11.3	W10G11.3	WBGene00021136
	F54E2.1	F54E2.1	WBGene00018823
	clec-69	F56D6.15	WBGene00044642
	dhp-1	R06C7.3	WBGene00000963
	W06G6.11	W06G6.11	WBGene00012313
	nlp-7	F18E9.2	WBGene00003745
	ckb-2	B0285.9	WBGene00000512
	C17B7.12	C17B7.12	WBGene00015886
	clec-67	F56D6.2	WBGene00018971
	C23H5.8	C23H5.8	WBGene00016027
	nlp-33	T19C4.7	WBGene00003771
	sma-3	R13F6.9	WBGene00004857
	nhr-64	C45E1.1	WBGene00003654
	nhr-58	R11G11.2	WBGene00003648
	Y40D12A.2	Y40D12A.2	WBGene00021503
	F59D6.3	F59D6.3	WBGene00019105
	dhp-1	R06C7.3	WBGene00000963
	fbxa-38	C39B5.4	WBGene00016522
	scl-5	C39E9.2	WBGene00008027
	Y57G11C.40	Y57G11C.40	WBGene00013329
	F15D4.5	F15D4.5	WBGene00008862
	R10D12.1	R10D12.1	WBGene00011185
	F48F7.8	F48F7.8	WBGene00009853
	C55C3.3	C55C3.3	WBGene00016953
	F33G12.6	F33G12.6	WBGene00018018
	fipr-24	C37A5.8	WBGene00007992
	K09C4.1	K09C4.1	WBGene00019547	DOWN	UP	NC
	H25K10.1	H25K10.1	WBGene00010411
	Y48G8AL.1	Y48G8AL.1	WBGene00021685
	tag-38	B0222.4	WBGene00006418
	cyp-35A2	C03G6.15	WBGene00015400
	clec-227	F08H9.5	WBGene00008593
	cyp-35A5	K07C6.5	WBGene00019473
	cpr-1	C52E4.1	WBGene00000781
	F21C10.9	F21C10.9	WBGene00017658
	ZK856.5	ZK856.5	WBGene00014106
	F44D12.9	F44D12.9	WBGene00009686
	nit-1	ZK1058.6	WBGene00014206
	T05E7.1	T05E7.1	WBGene00020258
	F08A8.2	F08A8.2	WBGene00008565
	C55F2.1	C55F2.1	WBGene00016957
	Y48E1B.8	Y48E1B.8	WBGene00013007
	F42G8.8	F42G8.8	WBGene00018359
	asah-1	K11D2.2	WBGene00010769
	D1025.2	D1025.2	WBGene00008354
	F11D5.5	F11D5.5	WBGene00017382
	C13C4.5	C13C4.5	WBGene00007549
	F55A3.2	F55A3.2	WBGene00018848
	ZK6.7	ZK6.7	WBGene00022642
	cpr-6	C25B8.3	WBGene00000786
	ugt-17	C08B6.1	WBGene00007422
	elo-2	F11E6.5	WBGene00001240
	F18E3.7	F18E3.7	WBGene00017565
	elo-5	F41H10.7	WBGene00001243
	F27D4.4	F27D4.4	WBGene00009189
	F55E10.7	F55E10.7	WBGene00018886
	F18E3.7	F18E3.7	WBGene00017565
	gur-4	K09E4.5	WBGene00001805
	clec-54	F08H9.8	WBGene00008596
	F08A8.3	F08A8.3	WBGene00008566
	C46C11.2	C46C11.2	WBGene00016705
	H41C03.3	H41C03.3	WBGene00019270
	F57F5.1	F57F5.1	WBGene00010204
	W07G9.2	W07G9.2	WBGene00019546
	C05D2.8	C05D2.8	WBGene00015469
	R03G8.6	R03G8.6	WBGene00011000
	K09H11.7	K09H11.7	WBGene00019604
	acs-1	F46E10.1	WBGene00018488
Genes unique to hcf-1(-)	tag-234	F55C12.7	WBGene00018874	UP	NC	NC
	K10G9.1	K10G9.1	WBGene00010755
	mtm-3	T24A11.1	WBGene00003476
	Y47H9C.1	Y47H9C.1	WBGene00012947
	F40F8.4	F40F8.4	WBGene00009577
	cam-1	C01G6.8	WBGene00000289
	his-9	ZK131.3	WBGene00001883
	vab-8	K12F2.2	WBGene00006874	DOWN	NC	NC
	F55F3.4	F55F3.4	WBGene00010118
	C06H5.6	C06H5.6	WBGene00007394
	nas-20	T11F9.3	WBGene00003539
	vit-6	K07H8.6	WBGene00006930
	C06G1.5	C06G1.5	WBGene00015548
	T04A8.5	T04A8.5	WBGene00011407
	K10C2.1	K10C2.1	WBGene00019617
	F41G4.1	F41G4.1	WBGene00018307
	art-1	C15F1.6	WBGene00000198
	add-1	F39C12.2	WBGene00000072
	egl-13	T22B7.1	WBGene00001182
	C37C3.2	C37C3.2	WBGene00016496
	ZK1240.9	ZK1240.9	WBGene00022873
	dct-17	F35E12.7	WBGene00009431
	F21G4.1	F21G4.1	WBGene00009023
	sesn-1	Y74C9A.5	WBGene00022279
	hum-8	Y66H1A.6	WBGene00002041
	sri-60	Y47G7B.3	WBGene00005572
	clec-173	T26C12.6	WBGene00044469
	dys-1	F15D3.1	WBGene00001131
	gst-10	Y45G12C.2	WBGene00001758
	ugt-47	R04B5.9	WBGene00011006
	add-1	F39C12.2	WBGene00000072
	M01H9.1	M01H9.1	WBGene00019717
	srsx-8	F52F10.5	WBGene00018709
	F39G3.5	F39G3.5	WBGene00018210
	H32K16.1	H32K16.1	WBGene00010421
	Y73E7A.3	Y73E7A.3	WBGene00022270
	F46G10.4	F46G10.4	WBGene00009798
	T06A1.5	T06A1.5	WBGene00020280
	C44H9.6	C44H9.6	WBGene00008101
	T22B11.5	T22B11.5	WBGene00020679
	R09F10.1	R09F10.1	WBGene00019986
	C29F7.1	C29F7.1	WBGene00007810
	vit-5	C04F6.1	WBGene00006929
	C35A11.4	C35A11.4	WBGene00016431
	Y39D8A.1	Y39D8A.1	WBGene00021448
	vit-3	F59D8.1	WBGene00006927
	C55F2.1	C55F2.1	WBGene00016957
	vit-4	F59D8.2	WBGene00006928
	C46H11.2	C46H11.2	WBGene00016728
	asm-3	W03G1.7	WBGene00000213
	lips-14	H17B01.3	WBGene00019208
	twk-12	F29F11.4	WBGene00006667
Genes unique to sir-2.1(O/E)	alh-1	F54D8.3	WBGene00000107	NC	UP	NC
	cyp-14A2	K09A11.3	WBGene00010706
	B0511.2	B0511.2	WBGene00015228
	ugt-43	F01D4.1	WBGene00008485
	C44B7.10	C44B7.10	WBGene00016630
	pgp-1	K08E7.9	WBGene00003995
	glt-6	R05G6.6	WBGene00001624
	R08D7.7	R08D7.7	WBGene00011147
	F53F1.2	F53F1.2	WBGene00009980
	ugtp-1	ZK370.7	WBGene00022721
	Y39B6A.41	Y39B6A.41	WBGene00012699
	spp-8	C28C12.5	WBGene00004993
	C34F11.3	C34F11.3	WBGene00016415	NC	DOWN	NC
	hsp-16.2	Y46H3A.3	WBGene00002016
	F35C12.3	F35C12.3	WBGene00009408
	trpa-1	C29E6.2	WBGene00007801
	T19D12.4	T19D12.4	WBGene00020579
	sdz-2	C08A9.7	WBGene00015587
	F47B7.6	F47B7.6	WBGene00018537
	K06A4.5	K06A4.5	WBGene00010595
	cat-4	F32G8.6	WBGene00000298
	F41G3.10	F41G3.10	WBGene00018303
	fbxa-157	C06H5.2	WBGene00007393
	nhr-220	T19H12.8	WBGene00020591
	F31D4.5	F31D4.5	WBGene00009292
	F58G6.9	F58G6.9	WBGene00044107
	Y55D5A.4	Y55D5A.4	WBGene00021918
	twk-24	F55C5.3	WBGene00006677
	R102.4	R102.4	WBGene00011291
	glit-1	F55D10.3	WBGene00018878
Genes unique to daf-2(-)	mif-2	C52E4.2	WBGene00003235	NC	NC	UP
	W03G11.2	W03G11.2	WBGene00012224
	Y34B4A.4	Y34B4A.4	WBGene00021320
	T01D1.4	T01D1.4	WBGene00020149
	col-176	ZC373.7	WBGene00000749
	C18A3.4	C18A3.4	WBGene00015942
	grd-4	T01B10.1	WBGene00001693
	R08E5.2	R08E5.2	WBGene00019962
	F59E11.5	F59E11.5	WBGene00019111
	cex-1	F56D1.6	WBGene00023407
	Y22D7AR.10	Y22D7AR.10	WBGene00021263
	pgp-3	ZK455.7	WBGene00003997
	nhr-107	C33G8.11	WBGene00003697
	clec-178	T19E7.1	WBGene00020585
	ZK856.7	ZK856.7	WBGene00014108
	col-71	Y49F6B.10	WBGene00000647
	Y47D7A.6	Y47D7A.6	WBGene00021619
	pqn-78	Y105C5A.5	WBGene00004159
	mca-1	W09C2.3	WBGene00003151
	Y71G12B.4	Y71G12B.4	WBGene00022144
	D1054.11	D1054.11	WBGene00008378
	uvt-5	F56B6.4	WBGene00006863
	act-1	T04C12.6	WBGene00000063
	ketn-1	F54E2.3	WBGene00004130
	acl-12	C01C10.3	WBGene00015295
	C04C11.2	C04C11.2	WBGene00007296
	col-155	F55C10.3	WBGene00000728
	ttr-2	K03H1.4	WBGene00010539
	col-152	F32G8.5	WBGene00000725
	atf-5	T04C10.4	WBGene00000221
	lntl-1	C31H1.6	WBGene00016289
	Y23H5A.8	Y23H5A.8	WBGene00023172
	clec-1	F25B4.9	WBGene00017772
	tag-140	T11F9.2	WBGene00006486
	skr-3	F44G3.6	WBGene00004809
	F23B12.4	F23B12.4	WBGene00009081
	cpn-3	F28H1.2	WBGene00000779
	K02F2.5	K02F2.5	WBGene00019324
	C15A11.4	C15A11.4	WBGene00007598
	K04F1.9	K04F1.9	WBGene00019388
	F22B8.7	F22B8.7	WBGene00009049
	ZK1037.6	ZK1037.6	WBGene00014194
	clec-62	F35C5.5	WBGene00009393
	C25E10.8	C25E10.8	WBGene00016097
	pqn-44	F55A12.9	WBGene00004131
	F45E4.5	F45E4.5	WBGene00018470
	F49H12.5	F49H12.5	WBGene00018656
	C31B8.8	C31B8.8	WBGene00016283
	dpf-2	C27C12.7	WBGene00001055
	T19C3.1	T19C3.1	WBGene00020559
	nex-2	T07C4.9	WBGene00003589
	nhr-76	C05G6.1	WBGene00015497
	tps-2	F19H8.1	WBGene00006603
	W08E12.8	W08E12.8	WBGene00021089
	twk-5	B0334.2	WBGene00006660
	nhr-211	T01G6.5	WBGene00020152
	K02G10.3	K02G10.3	WBGene00019345
	C54D1.7	C54D1.7	WBGene00016914
	B0222.3	B0222.3	WBGene00015055
	Y51H4A.13	Y51H4A.13	WBGene00013107
	cyp-34A8	B0213.14	WBGene00015043
	tmbi-4	B0563.4	WBGene00006479
	nas-31	F58B4.1	WBGene00003549
	F42A8.1	F42A8.1	WBGene00009626
	flp-4	C18D1.3	WBGene00001447
	F16B4.7	F16B4.7	WBGene00017509
	Y19D10A.5	Y19D10A.5	WBGene00021220
	adt-2	F08C6.1	WBGene00000083
	F56F10.2	F56F10.2	WBGene00018985
	K09C6.1	K09C6.1	WBGene00019555
	ceh-18	ZC64.3	WBGene00000441
	pah-1	K08F8.4	WBGene00000240
	C10G8.4	C10G8.4	WBGene00015683
	rol-6	T01B7.7	WBGene00004397
	T07A5.3	T07A5.3	WBGene00011556
	K06A4.7	K06A4.7	WBGene00010597
	B0507.10	B0507.10	WBGene00015227
	col-141	T15B7.5	WBGene00000714
	mec-17	F57H12.7	WBGene00003178
	C54D10.10	C54D10.10	WBGene00008304
	F09A5.1	F09A5.1	WBGene00008598
	F53G12.3	F53G12.3	WBGene00018771
	F39B2.8	F39B2.8	WBGene00009558
	T20G5.8	T20G5.8	WBGene00011870
	abf-6	T22H6.7	WBGene00000017
	lgc-26	Y58G8A.1	WBGene00021981
	col-90	C29E4.1	WBGene00000665
	nspa-3	ZC412.7	WBGene00013888
	F55B11.4	F55B11.4	WBGene00010086
	F53A9.1	F53A9.1	WBGene00018724
	C01F6.2	C01F6.2	WBGene00007222
	ZK909.6	ZK909.6	WBGene00014150
	F40E3.5	F40E3.5	WBGene00018232
	C33F10.8	C33F10.8	WBGene00016356
	srd-74	C24H11.4	WBGene00007701
	ttr-32	R13A5.3	WBGene00020047
	fipr-2	F23H12.9	WBGene00009097
	cnc-10	VK10D6R.1	WBGene00012152
	R05D3.9	R05D3.9	WBGene00019882
	grd-13	W05E7.3	WBGene00001702
	T25G12.3	T25G12.3	WBGene00020811
	ost-1	C44B12.2	WBGene00003893
	F55A12.6	F55A12.6	WBGene00018865
	unc-25	Y37D8A.23	WBGene00006762
	ttr-35	F22A3.2	WBGene00017688
	mrp-1	F57C12.5	WBGene00003407
	stn-2	F27D9.8	WBGene00017866
	flp-28	W07E11.4	WBGene00044686
	Y73B6BL.24	Y73B6BL.24	WBGene00022245
	his-71	F45E1.6	WBGene00001945
	Y38F1A.8	Y38F1A.8	WBGene00012610
	ras-2	F17C8.4	WBGene00004311
	C18C4.5	C18C4.5	WBGene00015966
	grl-4	F42C5.7	WBGene00001713
	F54C8.1	F54C8.1	WBGene00010035
	C18B2.3	C18B2.3	WBGene00015954
	F41D9.2	F41D9.2	WBGene00018282
	K09H9.8	K09H9.8	WBGene00045387
	toh-1	T24A11.3	WBGene00006591
	C17H12.10	C17H12.10	WBGene00015935
	Y45F10B.13	Y45F10B.13	WBGene00012875
	W09D12.1	W09D12.1	WBGene00012364
	ZK180.5	ZK180.5	WBGene00022679
	tag-32	T13A10.11	WBGene00006416
	ptr-11	F56C11.2	WBGene00004225
	pes-23	F14B8.3	WBGene00003987
	hsp-25	C09B8.6	WBGene00002023
	B0034.1	B0034.1	WBGene00015002
	unc-60	C38C3.5	WBGene00006794
	lim-9	F25H5.1	WBGene00006407
	F35D11.1	F35D11.1	WBGene00018043
	D1086.8	D1086.8	WBGene00008395
	ZC443.1	ZC443.1	WBGene00013896
	C51E3.9	C51E3.9	WBGene00008254
	K08C7.7	K08C7.7	WBGene00010649
	asp-6	F21F8.7	WBGene00000219
	F46H5.7	F46H5.7	WBGene00018522
	T28B4.1	T28B4.1	WBGene00020884
	Y51F10.7	Y51F10.7	WBGene00021768
	C32E12.4	C32E12.4	WBGene00016330
	unc-25	Y37D8A.23	WBGene00006762
	C45G9.12	C45G9.12	WBGene00016683
	C27A7.3	C27A7.3	WBGene00007755
	dpy-4	Y41E3.2	WBGene00001066
	C51E3.6	C51E3.6	WBGene00008252
	C07A4.3	C07A4.3	WBGene00007398
	C28A5.6	C28A5.6	WBGene00007791
	pph-1	C05A2.1	WBGene00004083
	B0416.3	B0416.3	WBGene00015179
	T27D12.1	T27D12.1	WBGene00012085
	ZK1055.7	ZK1055.7	WBGene00022848
	Y46G5A.20	Y46G5A.20	WBGene00012910
	F35C11.6	F35C11.6	WBGene00009405
	cnc-8	F41E7.8	WBGene00009624
	T03G6.3	T03G6.3	WBGene00020195
	uvt-5	F56B6.4	WBGene00006863
	K04G2.9	K04G2.9	WBGene00010567
	F37C4.5	F37C4.5	WBGene00018145
	act-4	M03F4.2	WBGene00000066
	C30F12.5	C30F12.5	WBGene00016264
	F40F9.5	F40F9.5	WBGene00009582
	T07D4.2	T07D4.2	WBGene00011579
	F35H10.10	F35H10.10	WBGene00018073
	flp-12	C05E11.8	WBGene00001455
	pqn-89	Y73B6BR.1	WBGene00004169
	ZK970.7	ZK970.7	WBGene00014173
	col-98	F14F7.1	WBGene00000673
	nhr-153	C13C4.1	WBGene00007546
	F31D5.2	F31D5.2	WBGene00017945
	F16H6.7	F16H6.7	WBGene00008897
	sbp-1	Y47D3B.7	WBGene00004735
	C47E12.12	C47E12.12	WBGene00008155
	ifa-4	K05B2.3	WBGene00002052
	F21C10.7	F21C10.7	WBGene00017657
	tre-4	F15A2.2	WBGene00006610
	col-105	F58F6.2	WBGene00000679
	ZK909.3	ZK909.3	WBGene00014148
	F35E12.8	F35E12.8	WBGene00009432
	F53B3.6	F53B3.6	WBGene00018744
	F47E1.2	F47E1.2	WBGene00018566
	R03A10.5	R03A10.5	WBGene00010985
	Y73F4A.2	Y73F4A.2	WBGene00013515
	col-160	F57B1.4	WBGene00000733
	C38C3.8	C38C3.8	WBGene00016516
	C53A5.13	C53A5.13	WBGene00008270
	lon-1	F48E8.1	WBGene00003055
	C14H10.1	C14H10.1	WBGene00007591
	mtd-1	ZK337.5	WBGene00003471
	Y7A5A.1	Y7A5A.1	WBGene00012407
	kin-16	M176.7	WBGene00002200
	mua-6	W10G6.3	WBGene00003485
	clh-4	T06F4.2	WBGene00000531
	gei-16	T17H7.4	WBGene00001573
	F49E2.5	F49E2.5	WBGene00009888
	F26G1.2	F26G1.2	WBGene00017838
	col-96	Y41C4A.19	WBGene00000671
	sulp-5	K12G11.2	WBGene00010789
	F42C5.9	F42C5.9	WBGene00018349
	T25F10.3	T25F10.3	WBGene00020806
	nlp-24	F35B12.7	WBGene00003762
	clec-197	C49C3.12	WBGene00008202
	F21F3.1	F21F3.1	WBGene00017671
	F13H10.6	F13H10.6	WBGene00008777
	K11D12.9	K11D12.9	WBGene00019649
	Y41C4A.13	Y41C4A.13	WBGene00012759
	lgc-44	F46F3.2	WBGene00009790
	F53B1.8	F53B1.8	WBGene00018739
	F35A5.1	F35A5.1	WBGene00018024
	unc-60	C38C3.5	WBGene00006794
	C08H9.15	C08H9.15	WBGene00007474
	tag-308	B0228.4	WBGene00015061
	B0416.7	B0416.7	WBGene00015182
	alp-1	T11B7.4	WBGene00001132
	W01B11.6	W01B11.6	WBGene00020917
	col-107	C34H4.4	WBGene00000681
	C34E7.4	C34E7.4	WBGene00007934
	D1086.10	D1086.10	WBGene00044080
	swm-1	C25E10.9	WBGene00023417
	C30F12.3	C30F12.3	WBGene00016262
	C34B2.11	C34B2.11	WBGene00016396
	flp-22	F39H2.1	WBGene00009562
	C52D10.1	C52D10.1	WBGene00016875
	clc-5	C01C10.4	WBGene00000526
	ptr-14	R09H10.4	WBGene00004228
	K11D9.3	K11D9.3	WBGene00010772
	F58E6.1	F58E6.1	WBGene00010251
	cyp-33C3	F41B5.4	WBGene00018262
	C14A4.13	C14A4.13	WBGene00007563
	R02F11.3	R02F11.3	WBGene00019841
	twk-18	C24A3.6	WBGene00006672
	dpy-13	F30B5.1	WBGene00001074
	DH11.1	DH11.1	WBGene00008435
	bli-1	C09G5.6	WBGene00000251
	F53G12.4	F53G12.4	WBGene00018772
	C50F4.9	C50F4.9	WBGene00008234
	Y71F9B.13	Y71F9B.13	WBGene00022131
	col-123	W08D2.6	WBGene00000697
	Y39B6A.5	Y39B6A.5	WBGene00012668
	F43C11.3	F43C11.3	WBGene00018380
	nhx-1	B0395.1	WBGene00003729
	C09H5.2	C09H5.2	WBGene00015660
	D2007.1	D2007.1	WBGene00017041
	flp-11	K02G10.4	WBGene00001454
	F46G10.1	F46G10.1	WBGene00009796
	ZK512.7	ZK512.7	WBGene00013986
	cyp-33A1	C12D5.7	WBGene00015709
	F40E10.6	F40E10.6	WBGene00009574
	C24G6.2	C24G6.2	WBGene00016059
	C08F11.11	C08F11.11	WBGene00007458
	flp-6	F07D3.2	WBGene00001449
	tsp-8	F33C8.3	WBGene00006634
	C06A8.3	C06A8.3	WBGene00015514
	C39H7.4	C39H7.4	WBGene00016542
	bcc-1	M7.3	WBGene00000246
	W03G1.5	W03G1.5	WBGene00021011
	C35C5.9	C35C5.9	WBGene00007958
	M05B5.6	M05B5.6	WBGene00010873
	W02D7.8	W02D7.8	WBGene00020943
	K08E4.7	K08E4.7	WBGene00045036
	tag-163	M01E11.7	WBGene00006508
	M28.8	M28.8	WBGene00010899
	grl-21	ZC168.5	WBGene00001730
	ipp-5	C09B8.1	WBGene00002146
	ZK973.8	ZK973.8	WBGene00022834
	Y71H10A.2	Y71H10A.2	WBGene00022200
	Y71H2AM.13	Y71H2AM.13	WBGene00022178
	ZK54.1	ZK54.1	WBGene00022647
	C01B10.6	C01B10.6	WBGene00015280
	H04M03.12	H04M03.12	WBGene00019156
	spp-15	C48E7.10	WBGene00005000
	T12D8.4	T12D8.4	WBGene00011732
	asp-4	R12H7.2	WBGene00000217
	bath-21	F59H6.8	WBGene00019138
	col-171	T10E10.7	WBGene00000744
	F49E2.5	F49E2.5	WBGene00009888
	C06G8.1	C06G8.1	WBGene00007384
	F33D11.1	F33D11.1	WBGene00018000
	Y42H9AR.5	Y42H9AR.5	WBGene00021540
	T23E7.2	T23E7.2	WBGene00020732
	T23E7.2	T23E7.2	WBGene00020732
	unc-87	F08B6.4	WBGene00006819
	K09G1.1	K09G1.1	WBGene00010727
	W03D2.6	W03D2.6	WBGene00020981
	mec-3	F01D4.6	WBGene00003167
	Y39C12A.1	Y39C12A.1	WBGene00012704
	T15B12.1	T15B12.1	WBGene00020530
	bli-3	F56C11.1	WBGene00000253
	F40F8.12	F40F8.12	WBGene00044917
	C04G2.10	C04G2.10	WBGene00007309
	F57H12.6	F57H12.6	WBGene00019021
	tag-18	T14G12.3	WBGene00006408
	col-60	F22D6.10	WBGene00000636
	D1054.10	D1054.10	WBGene00008377
	cor-1	R01H10.3	WBGene00000768
	C29F5.1	C29F5.1	WBGene00016210
	elt-2	C33D3.1	WBGene00001250
	ugt-2	AC3.8	WBGene00007073
	skr-4	Y60A3A.18	WBGene00004810
	srh-11	R09F10.6	WBGene00005237
	eps-8	Y57G11C.24	WBGene00001330
	C27A7.8	C27A7.8	WBGene00007758
	W01F3.1	W01F3.1	WBGene00012184
	C49A9.3	C49A9.3	WBGene00016757
	F01D5.8	F01D5.8	WBGene00008498
	ace-1	W09B12.1	WBGene00000035
	F15G9.1	F15G9.1	WBGene00008865
	C28H8.11	C28H8.11	WBGene00016201
	F44A2.5	F44A2.5	WBGene00018405
	unc-43	K11E8.1	WBGene00006779
	bath-24	B0047.3	WBGene00015014
	ttr-15	T07C4.5	WBGene00011561
	nhr-43	C29E6.5	WBGene00003633
	nhr-131	T01G6.2	WBGene00003721
	twk-33	W06D12.5	WBGene00006685
	ech-7	Y105E8A.4	WBGene00001156
	lbp-6	W02D3.5	WBGene00002258
	ras-1	C44C11.1	WBGene00004310
	F55B11.2	F55B11.2	WBGene00010084
	tnt-2	F53A9.10	WBGene00006587
	pdfr-1	C13B9.4	WBGene00015735
	E04F6.15	E04F6.15	WBGene00017131
	C39D10.8	C39D10.8	WBGene00016535
	F13D12.8	F13D12.8	WBGene00008742
	Y66D12A.11	Y66D12A.11	WBGene00013437
	Y71H10A.1	Y71H10A.1	WBGene00022199
	AC3.5	AC3.5	WBGene00007071
	Y18H1A.11	Y18H1A.11	WBGene00021215
	C07A12.7	C07A12.7	WBGene00015561
	F08F1.4	F08F1.4	WBGene00017258
	T22E5.1	T22E5.1	WBGene00020690
	Y69E1A.5	Y69E1A.5	WBGene00013477
	srx-70	K07C6.15	WBGene00005961
	unc-78	C04F6.4	WBGene00006810
	clec-85	Y54G2A.6	WBGene00021872
	dlc-3	Y10G11A.2	WBGene00012424
	F55B11.3	F55B11.3	WBGene00010085
	ptps-1	B0041.6	WBGene00015010
	F13D12.3	F13D12.3	WBGene00008739
	F41G4.8	F41G4.8	WBGene00018311
	ttr-16	Y5F2A.1	WBGene00012382
	pfn-2	F35C8.6	WBGene00003990
	Y65A5A.3	Y65A5A.3	WBGene00013420
	nhr-92	Y41D4B.8	WBGene00003682
	Y22D7AL.15	Y22D7AL.15	WBGene00021253
	Y95B8A.12	Y95B8A.12	WBGene00022391
	T14G8.2	T14G8.2	WBGene00011770
	nmy-1	F52B10.1	WBGene00003776
	Y37D8A.3	Y37D8A.3	WBGene00012545
	ugt-62	M88.1	WBGene00010904
	C06A8.8	C06A8.8	WBGene00015517
	Y106G6D.8	Y106G6D.8	WBGene00013704
	T04C12.1	T04C12.1	WBGene00011427
	C50B8.6	C50B8.6	WBGene00008228
	B0303.11	B0303.11	WBGene00015131
	Y26E6A.3	Y26E6A.3	WBGene00012514
	flp-1	F23B2.5	WBGene00001444
	R11F4.3	R11F4.3	WBGene00020009
	mlt-7	ZK430.8	WBGene00022743
	hsp-43	C14F11.5	WBGene00002024
	T19D12.2	T19D12.2	WBGene00020577
	Y54G2A.29	Y54G2A.29	WBGene00021893
	Y57G11A.4	Y57G11A.4	WBGene00013292
	nlp-1	C01C4.1	WBGene00003739
	C02F12.3	C02F12.3	WBGene00015354
	csq-1	F40E10.3	WBGene00000822
	ugt-23	C17G1.3	WBGene00007650
	H14A12.5	H14A12.5	WBGene00019197
	F26E4.12	F26E4.12	WBGene00009165
	Y43B11AR.1	Y43B11AR.1	WBGene00021543
	unc-27	ZK721.2	WBGene00006764
	atn-1	W04D2.1	WBGene00000228
	ZK418.7	ZK418.7	WBGene00022736
	ttr-8	R13A5.6	WBGene00020049
	B0218.1	B0218.1	WBGene00015047
	flp-24	C24A1.1	WBGene00016028
	nhr-212	T01G6.6	WBGene00020153
	col-14	C46A5.3	WBGene00000603
	col-68	C50D2.4	WBGene00000644
	R08E5.2	R08E5.2	WBGene00019962
	ZK1320.3	ZK1320.3	WBGene00014253
	C39E9.7	C39E9.7	WBGene00008031
	cutl-15	T21B10.6	WBGene00011888
	unc-43	K11E8.1	WBGene00006779
	F53C3.13	F53C3.13	WBGene00018756
	H06A10.1	H06A10.1	WBGene00010368
	lgc-43	C43F9.9	WBGene00008076
	ugt-11	T19H12.10	WBGene00020593
	col-91	F09G8.6	WBGene00000666
	unc-4	F26C11.2	WBGene00006744
	sbt-1	T03D8.3	WBGene00011392
	F20D6.5	F20D6.5	WBGene00017635
	T06D8.1	T06D8.1	WBGene00011522
	T24C2.5	T24C2.5	WBGene00011984
	tyr-2	K08E3.1	WBGene00010661
	T11G6.3	T11G6.3	WBGene00011718
	sulp-4	K12G11.1	WBGene00010788
	cor-1	R01H10.3	WBGene00000768
	C14A4.7	C14A4.7	WBGene00007558
	pcbd-1	T10B11.1	WBGene00020397
	D2030.12	D2030.12	WBGene00008421
	F49C12.6	F49C12.6	WBGene00009876
	col-169	T10E10.5	WBGene00000742
	F40A3.2	F40A3.2	WBGene00018217
	nspb-9	C01G12.11	WBGene00007251
	ugt-41	F10D2.11	WBGene00017336
	F32A5.2	F32A5.2	WBGene00017968
	plc-1	F31B12.1	WBGene00004036
	unc-43	K11E8.1	WBGene00006779
	F15G9.1	F15G9.1	WBGene00008865
	inx-10	T18H9.5	WBGene00002132
	F55A11.6	F55A11.6	WBGene00010079
	ZK355.2	ZK355.2	WBGene00022712
	ctg-2	T13H5.2	WBGene00011756
	K10D2.7	K10D2.7	WBGene00019633
	F18F11.5	F18F11.5	WBGene00017578
	far-6	W02A2.2	WBGene00001390
	C23H3.2	C23H3.2	WBGene00016018
	sth-1	ZC513.12	WBGene00006060
	gly-2	C55B7.2	WBGene00001627
	F54B8.4	F54B8.4	WBGene00010019
	mup-4	K07D8.1	WBGene00003497
	col-125	C29F4.1	WBGene00000699
	ZK593.2	ZK593.2	WBGene00014002
	C06H5.7	C06H5.7	WBGene00007395
	tag-344	B0511.4	WBGene00015230
	gly-6	H38K22.5	WBGene00001631
	F41C3.8	F41C3.8	WBGene00018274
	F59C6.14	F59C6.14	WBGene00044792
	slo-2	F08B12.3	WBGene00004831
	col-76	M110.1	WBGene00000652
	C48E7.1	C48E7.1	WBGene00016749
	Y46G5A.14	Y46G5A.14	WBGene00012905
	C09G5.7	C09G5.7	WBGene00007489
	lys-8	C17G10.5	WBGene00003097
	C16E9.1	C16E9.1	WBGene00015865
	R01B10.3	R01B10.3	WBGene00019805
	T14A8.2	T14A8.2	WBGene00020497
	aakb-1	F55F3.1	WBGene00010115
	lev-11	Y105E8B.1	WBGene00002978
	F08F1.4	F08F1.4	WBGene00017258
	ifa-1	F38B2.1	WBGene00002050
	chw-1	F22E12.2	WBGene00009059
	tag-299	F20D1.10	WBGene00008980
	lbp-2	F40F4.2	WBGene00002254
	col-142	T15B7.4	WBGene00000715
	F36G3.1	F36G3.1	WBGene00009482
	nlp-21	Y47D3B.2	WBGene00003759
	ZC84.4	ZC84.4	WBGene00013848
	C16B8.3	C16B8.3	WBGene00015823
	C31B8.4	C31B8.4	WBGene00016281
	C24B5.1	C24B5.1	WBGene00016044
	rskn-2	C54G4.1	WBGene00008311
	pvf-1	Y39A3CL.6	WBGene00004249
	alh-12	Y69F12A.2	WBGene00000118
	F49E2.5	F49E2.5	WBGene00009888
	T21D12.12	T21D12.12	WBGene00020651
	C01C4.3	C01C4.3	WBGene00015293
	Y54G2A.37	Y54G2A.37	WBGene00023484
	dur-1	F25H8.5	WBGene00001113
	swm-1	C25E10.9	WBGene00023417
	C01H6.2	C01H6.2	WBGene00007252
	Y64G10A.6	Y64G10A.6	WBGene00013415
	dhs-26	ZK816.5	WBGene00000989
	C01G12.7	C01G12.7	WBGene00007247
	col-112	Y73B6BL.34	WBGene00000686
	F23F1.7	F23F1.7	WBGene00017748
	fkh-6	B0286.5	WBGene00001438
	C23H3.2	C23H3.2	WBGene00016018
	B0454.6	B0454.6	WBGene00015197
	flp-20	E01H11.3	WBGene00001463
	Y73B6BL.35	Y73B6BL.35	WBGene00022254
	C28H8.11	C28H8.11	WBGene00016201
	F12D9.1	F12D9.1	WBGene00017400
	fip-6	F53B6.9	WBGene00009964
	F54F7.3	F54F7.3	WBGene00010065
	col-117	T28C6.4	WBGene00000691
	C07D10.1	C07D10.1	WBGene00015566
	F26G1.5	F26G1.5	WBGene00017841
	ZK795.1	ZK795.1	WBGene00014081
	Y43F4A.1	Y43F4A.1	WBGene00012796
	clc-2	C01C10.1	WBGene00000523
	F25H5.8	F25H5.8	WBGene00009130
	sdz-27	R07H5.4	WBGene00011124
	C23G10.6	C23G10.6	WBGene00016013
	lin-2	F17E5.1	WBGene00002991
	R11H6.4	R11H6.4	WBGene00011252
	fbxc-43	C16A11.9	WBGene00045297
	F53H10.2	F53H10.2	WBGene00010012
	F47G3.1	F47G3.1	WBGene00018576
	H03A11.1	H03A11.1	WBGene00010356
	R10E4.9	R10E4.9	WBGene00011205
	H34I24.2	H34I24.2	WBGene00019261
	R08E5.2	R08E5.2	WBGene00019962
	C14B9.3	C14B9.3	WBGene00015753
	Y71F9B.13	Y71F9B.13	WBGene00022131
	Y42A5A.3	Y42A5A.3	WBGene00012778
	sago-1	K12B6.1	WBGene00019666
	cor-1	R01H10.3	WBGene00000768
	C14A4.12	C14A4.12	WBGene00007562
	vhp-1	F08B1.1	WBGene00006923
	valv-1	B0496.7	WBGene00015216
	ZK849.5	ZK849.5	WBGene00014103
	C18E9.8	C18E9.8	WBGene00007688
	acr-12	R01E6.4	WBGene00000051
	zyx-1	F42G4.3	WBGene00006999
	R13H4.5	R13H4.5	WBGene00011263
	egl-3	C51E3.7	WBGene00001172
	col-161	C50B6.4	WBGene00000734
	T04F8.8	T04F8.8	WBGene00011446
	col-101	K02D7.3	WBGene00000675
	C52A10.1	C52A10.1	WBGene00016862
	F16G10.15	F16G10.15	WBGene00017529
	T08A9.11	T08A9.11	WBGene00020339
	F55C10.5	F55C10.5	WBGene00010109
	Y105C5A.24	Y105C5A.24	WBGene00013643
	cyp-32A1	C26F1.2	WBGene00016147
	C33A11.1	C33A11.1	WBGene00007877
	C18D11.1	C18D11.1	WBGene00007679
	col-73	F11G11.12	WBGene00000649
	F13D2.1	F13D2.1	WBGene00008735
	pqn-37	F40F4.8	WBGene00004124
	K02E11.5	K02E11.5	WBGene00010514
	slo-2	F08B12.3	WBGene00004831
	T23E7.2	T23E7.2	WBGene00020732
	F46H5.7	F46H5.7	WBGene00018522
	Y45F10A.7	Y45F10A.7	WBGene00012869
	C08F11.7	C08F11.7	WBGene00007454
	Y38F2AR.10	Y38F2AR.10	WBGene00021428
	F42G4.6	F42G4.6	WBGene00009643
	ZC116.1	ZC116.1	WBGene00013853
	unc-52	ZC101.2	WBGene00006787
	Y58A7A.1	Y58A7A.1	WBGene00021975
	cal-1	C13C12.1	WBGene00000285
	ketn-1	F54E2.3	WBGene00004130
	Y106G6D.6	Y106G6D.6	WBGene00013702
	F46H5.3	F46H5.3	WBGene00018519
	nlp-17	Y45F10A.5	WBGene00003755
	F36F2.1	F36F2.1	WBGene00009475
	egl-36	R07A4.1	WBGene00001202
	pfn-3	K03E6.6	WBGene00003991
	F37C4.4	F37C4.4	WBGene00018144
	col-150	B0024.2	WBGene00000723
	F58H1.6	F58H1.6	WBGene00010289
	gei-15	M03A8.4	WBGene00001572
	fkh-9	K03C7.2	WBGene00001441
	rbf-1	F37A4.7	WBGene00004316
	tap-1	C44H4.5	WBGene00006524
	ttr-30	T08A9.2	WBGene00020335
	ncs-3	K03E6.3	WBGene00003565
	unc-98	F08C6.7	WBGene00006827
	mlc-1	C36E6.3	WBGene00003369
	Y54F10BM.3	Y54F10BM.3	WBGene00021858
	avr-15	R11G10.1	WBGene00000233
	far-5	F15B9.3	WBGene00001389
	ttr-41	F10G7.11	WBGene00017374
	T26C5.4	T26C5.4	WBGene00012034
	F46H5.3	F46H5.3	WBGene00018519
	F49C12.7	F49C12.7	WBGene00009877
	T23E7.2	T23E7.2	WBGene00020732
	F14F9.5	F14F9.5	WBGene00017468
	ttr-3	K03H1.3	WBGene00010538
	twk-25	M04B2.5	WBGene00006678
	col-84	K12D12.3	WBGene00000659
	W01A8.8	W01A8.8	WBGene00044988
	col-54	F33D11.3	WBGene00000631
	F17C11.2	F17C11.2	WBGene00008914
	kgb-1	T07A9.3	WBGene00002187
	C06A1.2	C06A1.2	WBGene00007353
	T23B12.8	T23B12.8	WBGene00020722
	tba-9	F40F4.5	WBGene00006535
	ZK353.2	ZK353.2	WBGene00022698
	ttr-51	JC8.8	WBGene00010440
	col-130	F08G5.4	WBGene00000704
	pes-8	F18G5.2	WBGene00003981
	gpa-12	F18G5.3	WBGene00001674
	ttr-7	T19C3.9	WBGene00020566
	W04E12.7	W04E12.7	WBGene00012252
	col-119	C53B4.5	WBGene00000693
	C42D8.1	C42D8.1	WBGene00016599
	B0454.5	B0454.5	WBGene00015196
	grsp-2	T28C6.1	WBGene00012118
	sta-1	Y51H4A.17	WBGene00013111
	fbxa-63	Y119D3B.7	WBGene00022485
	R102.2	R102.2	WBGene00011289
	nas-37	C17G1.6	WBGene00003553
	F37C4.5	F37C4.5	WBGene00018145
	C34C6.3	C34C6.3	WBGene00007916
	bath-13	F40B1.1	WBGene00018223
	eft-4	R03G5.1	WBGene00001169
	cdr-6	K01D12.12	WBGene00010471
	mua-1	F54H5.4	WBGene00003480
	ZC373.4	ZC373.4	WBGene00013869
	F40H3.2	F40H3.2	WBGene00018250
	sqt-1	B0491.2	WBGene00005016
	Y53G8AR.9	Y53G8AR.9	WBGene00021816
	T22B7.7	T22B7.7	WBGene00020674
	K07C11.8	K07C11.8	WBGene00019480
	F19F10.3	F19F10.3	WBGene00017599
	nhr-287	Y41D4B.20	WBGene00021521
	C40C9.3	C40C9.3	WBGene00008036
	bli-2	F59E12.12	WBGene00000252
	C06E7.2	C06E7.2	WBGene00015539
	cca-1	C54D2.5	WBGene00000367
	F28C6.10	F28C6.10	WBGene00009209
	C06A12.3	C06A12.3	WBGene00007357
	lec-6	Y55B1AR.1	WBGene00002269
	ZC449.4	ZC449.4	WBGene00022614
	ptr-8	F44F4.4	WBGene00004222
	F21F8.4	F21F8.4	WBGene00017678
	K08E7.1	K08E7.1	WBGene00010671
	mlc-2	C36E6.5	WBGene00003370
	C05B5.8	C05B5.8	WBGene00007324
	ttr-18	B0334.1	WBGene00007142
	F41G3.1	F41G3.1	WBGene00018298
	C46E1.3	C46E1.3	WBGene00008116
	ptr-12	K07A3.2	WBGene00004226
	tyr-4	C34G6.2	WBGene00016419
	dpy-5	F27C1.8	WBGene00001067
	B0513.9	B0513.9	WBGene00007200
	fbxa-107	Y37H2A.4	WBGene00012564
	F26A1.8	F26A1.8	WBGene00017806
	fipr-13	F57A8.8	WBGene00010183
	F44F4.10	F44F4.10	WBGene00009705
	col-94	W05B2.1	WBGene00000669
	C01H6.8	C01H6.8	WBGene00007257
	ptr-23	ZK270.1	WBGene00004237
	dyf-3	C04C3.5	WBGene00001119
	col-107	C34H4.4	WBGene00000681
	col-117	T28C6.4	WBGene00000691
	flp-14	Y37D8A.15	WBGene00001457
	lpr-2	T12A7.5	WBGene00011726
	sulp-2	F14D12.5	WBGene00017464
	col-88	W05G11.3	WBGene00000663
	ugt-19	K08B4.3	WBGene00019515
	clec-56	F08H9.7	WBGene00008595
	ugt-6	ZC455.4	WBGene00013904
	dod-6	T20G5.7	WBGene00011869
	col-116	F17E9.1	WBGene00000690
	T05D4.1	T05D4.1	WBGene00011474
	F35H8.2	F35H8.2	WBGene00009447
	F32A5.8	F32A5.8	WBGene00017971
	T08B2.11	T08B2.11	WBGene00020349
	T04C12.3	T04C12.3	WBGene00011428
	F35F10.6	F35F10.6	WBGene00018056
	Y43F8B.1	Y43F8B.1	WBGene00012812
	F02C12.1	F02C12.1	WBGene00008515
	F10F2.2	F10F2.2	WBGene00008654
	W02C12.2	W02C12.2	WBGene00020929
	F21C10.3	F21C10.3	WBGene00017653
	twk-28	C52B9.6	WBGene00006680
	M01A8.1	M01A8.1	WBGene00010795
	F47B10.5	F47B10.5	WBGene00009816
	Y55B1BL.1	Y55B1BL.1	WBGene00021909
	F59B10.5	F59B10.5	WBGene00010321
	F47G6.2	F47G6.2	WBGene00018579
	Y57G7A.1	Y57G7A.1	WBGene00021965
	cdr-4	K01D12.11	WBGene00010470
	opt-1	C06G8.2	WBGene00003876
	F08B12.4	F08B12.4	WBGene00008572
	sms-3	Y22D7AL.8	WBGene00004894
	try-9	B0286.6	WBGene00023425
	W01F3.2	W01F3.2	WBGene00012185
	F23D12.7	F23D12.7	WBGene00009091
	fbp-1	K07A3.1	WBGene00001404
	Y37D8A.6	Y37D8A.6	WBGene00012548
	F35D11.3	F35D11.3	WBGene00018044
	dhs-5	F56D1.5	WBGene00000969
	flna-1	C23F12.1	WBGene00016006
	dct-7	F15E6.8	WBGene00017488
	T28C6.8	T28C6.8	WBGene00012122
	R09A1.5	R09A1.5	WBGene00019975
	C07E3.3	C07E3.3	WBGene00007414
	pgp-10	C54D1.1	WBGene00004004
	tig-2	F39G3.8	WBGene00006570
	C05C10.4	C05C10.4	WBGene00007331
	ZK813.1	ZK813.1	WBGene00022820
	hint-3	C26F1.7	WBGene00016150
	hacd-1	R09B5.6	WBGene00019978
	F32G8.4	F32G8.4	WBGene00009340
	T19D12.2	T19D12.2	WBGene00020577
	C48B4.1	C48B4.1	WBGene00008167
	gst-24	F37B1.1	WBGene00001772
	C44B7.6	C44B7.6	WBGene00016628
	uvt-2	C24H10.5	WBGene00006861
	math-35	R52.3	WBGene00020075
	C25G4.11	C25G4.11	WBGene00007737
	ZK1055.6	ZK1055.6	WBGene00022847
	C05D12.1	C05D12.1	WBGene00007339
	sul-3	C54D2.4	WBGene00006310
	lfi-1	ZC8.4	WBGene00022500
	grd-3	W05E7.1	WBGene00001692
	hsp-12.3	F38E11.1	WBGene00002012
	Y113G7B.14	Y113G7B.14	WBGene00013763
	Y69H2.3	Y69H2.3	WBGene00013481
	C27B7.9	C27B7.9	WBGene00007765
	dct-6	F25B5.1	WBGene00017773
	lgc-22	F15E6.2	WBGene00017483
	F08D12.7	F08D12.7	WBGene00017250
	ttr-26	Y51A2D.11	WBGene00013079
	T19D12.2	T19D12.2	WBGene00020577
	lec-9	C16H3.2	WBGene00002272
	T04F8.7	T04F8.7	WBGene00011445
	nhr-53	K06B4.11	WBGene00003643
	pgp-4	F42E11.1	WBGene00003998
	tba-7	T28D6.2	WBGene00006533
	F47B8.3	F47B8.3	WBGene00009804
	fbxa-59	T12B5.8	WBGene00020455
	B0395.3	B0395.3	WBGene00007175
	Y39B6A.11	Y39B6A.11	WBGene00012673
	lec-7	R07B1.2	WBGene00002270
	T08B1.6	T08B1.6	WBGene00020343
	E01A2.7	E01A2.7	WBGene00017089
	F17E9.4	F17E9.4	WBGene00017541
	Y67D8C.6	Y67D8C.6	WBGene00022070
	kgb-2	ZC416.4	WBGene00002188
	ZC412.8	ZC412.8	WBGene00013889
	H32K16.2	H32K16.2	WBGene00010422
	unc-38	F21F3.5	WBGene00006774
	bath-1	F59H6.9	WBGene00019139
	fbxa-88	F10A3.2	WBGene00008632
	F20D6.11	F20D6.11	WBGene00017640
	ugt-14	H23N18.2	WBGene00019233
	Y53F4B.23	Y53F4B.23	WBGene00013169
	ctl-2	Y54G11A.5	WBGene00000831
	cpin-1	F38E11.3	WBGene00000775
	Y55F3AM.11	Y55F3AM.11	WBGene00021928
	F53E10.1	F53E10.1	WBGene00018758
	T23F2.3	T23F2.3	WBGene00020736
	Y69H2.10	Y69H2.10	WBGene00013485
	cab-1	C23H4.1	WBGene00000277
	F44A6.5	F44A6.5	WBGene00009677
	cpg-7	K09E4.6	WBGene00010723
	bath-47	T07H3.1	WBGene00006464
	F41E7.7	F41E7.7	WBGene00009623
	C54D10.13	C54D10.13	WBGene00045400
	B0457.2	B0457.2	WBGene00007178
	F49E2.5	F49E2.5	WBGene00009888
	Y41C4A.2	Y41C4A.2	WBGene00012750
	F41B4.1	F41B4.1	WBGene00018257
	C14A6.2	C14A6.2	WBGene00007566
	R04B3.2	R04B3.2	WBGene00019867
	F14B8.2	F14B8.2	WBGene00017445
	ZK1073.1	ZK1073.1	WBGene00014213
	C50F4.1	C50F4.1	WBGene00008229
	osm-11	F11C7.5	WBGene00003891
	C17G1.7	C17G1.7	WBGene00007653
	C53B7.7	C53B7.7	WBGene00016896
	M7.8	M7.8	WBGene00010884
	F42C5.4	F42C5.4	WBGene00018346
	Y46G5A.34	Y46G5A.34	WBGene00012919
	C55A6.7	C55A6.7	WBGene00008336
	F21A3.2	F21A3.2	WBGene00008992
	F54D1.6	F54D1.6	WBGene00010047
	dyf-14	F35D11.11	WBGene00018051
	K07B1.4	K07B1.4	WBGene00019464
	Y71H2B.4	Y71H2B.4	WBGene00022194
	C25E10.12	C25E10.12	WBGene00016101
	tbc-7	C31H2.1	WBGene00016292
	Y53G8B.1	Y53G8B.1	WBGene00021817
	F48D6.4	F48D6.4	WBGene00018602
	C34F11.8	C34F11.8	WBGene00016417
	ZK1290.10	ZK1290.10	WBGene00022891
	nas-5	T23H4.3	WBGene00003524
	T09A12.2	T09A12.2	WBGene00020373
	dhs-20	F35B12.2	WBGene00000983
	nspa-5	ZC412.6	WBGene00013887
	K03A11.5	K03A11.5	WBGene00010522
	C04E12.5	C04E12.5	WBGene00015435
	C13E3.1	C13E3.1	WBGene00015740
	E04F6.6	E04F6.6	WBGene00017126
	F09E10.7	F09E10.7	WBGene00017297
	srp-5	C03G6.18	WBGene00005646
	C29F9.3	C29F9.3	WBGene00016218
	ugt-13	H23N18.1	WBGene00019232
	F58E2.3	F58E2.3	WBGene00019047
	Y66H1B.5	Y66H1B.5	WBGene00022050
	T02B11.6	T02B11.6	WBGene00020157
	E01G4.3	E01G4.3	WBGene00008446
	C32D5.8	C32D5.8	WBGene00016316
	clec-83	Y54G2A.14	WBGene00021879
	F48D6.4	F48D6.4	WBGene00018602
	C25F9.5	C25F9.5	WBGene00007725
	ttr-47	H14N18.3	WBGene00019203
	F37H8.3	F37H8.3	WBGene00009512
	T23F2.2	T23F2.2	WBGene00020735
	ZK899.1	ZK899.1	WBGene00014140
	ins-33	W09C5.4	WBGene00002116
	Y45F10C.2	Y45F10C.2	WBGene00012878
	unc-78	C04F6.4	WBGene00006810
	dhs-31	T04B2.6	WBGene00011424
	F53B2.8	F53B2.8	WBGene00009957
	flp-11	K02G10.4	WBGene00001454
	ctg-1	H06O01.3	WBGene00010370
	K09H9.5	K09H9.5	WBGene00019597
	C41G11.1	C41G11.1	WBGene00016568
	nlp-21	Y47D3B.2	WBGene00003759
	C50H2.13	C50H2.13	WBGene00008246
	Y119C1B.9	Y119C1B.9	WBGene00022474
	C39D10.3	C39D10.3	WBGene00016531
	F55H12.4	F55H12.4	WBGene00010135
	F54D5.3	F54D5.3	WBGene00010049
	tyr-1	C02C2.1	WBGene00015332
	dpy-31	R151.5	WBGene00006592
	cdr-2	C54D10.1	WBGene00008296
	F22F4.4	F22F4.4	WBGene00017717
	nex-1	ZC155.1	WBGene00003588
	gsnl-1	K06A4.3	WBGene00010593
	F13D11.3	F13D11.3	WBGene00017428
	T19B10.2	T19B10.2	WBGene00011831
	nas-9	C37H5.9	WBGene00003528
	Y43F8A.3	Y43F8A.3	WBGene00012810
	nhr-132	R11G11.1	WBGene00003722
	F55G1.7	F55G1.7	WBGene00018903
	deg-1	C47C12.6	WBGene00000950
	C50F7.6	C50F7.6	WBGene00016846
	T19H5.4	T19H5.4	WBGene00011849
	F53A9.9	F53A9.9	WBGene00018732
	scl-22	T05A10.5	WBGene00011462
	H18N23.2	H18N23.2	WBGene00019211
	srp-6	C03G6.19	WBGene00005647
	hum-4	F46C3.3	WBGene00002037
	srj-14	C03G6.3	WBGene00005602
	gly-19	F22D6.12	WBGene00001644
	math-45	Y51H7BM.1	WBGene00021772
	gpd-3	K10B3.7	WBGene00001685
	Y66A7A.5	Y66A7A.5	WBGene00013425
	grd-10	F09D12.1	WBGene00001699
	C35B1.5	C35B1.5	WBGene00016435
	K02A11.3	K02A11.3	WBGene00010488
	math-24	C46F9.3	WBGene00016719
	F40H3.1	F40H3.1	WBGene00018249
	Y69H2.3	Y69H2.3	WBGene00013481
	ZK930.2	ZK930.2	WBGene00014152
	ZK742.4	ZK742.4	WBGene00022814
	clp-4	Y39A3CL.5	WBGene00000545
	B0281.3	B0281.3	WBGene00015110
	scrm-1	T22H2.5	WBGene00011935
	F43H9.4	F43H9.4	WBGene00018400
	F59D6.7	F59D6.7	WBGene00019108
	fbxa-69	F54B8.3	WBGene00010018
	Y59C2A.3	Y59C2A.3	WBGene00021986
	T25B2.2	T25B2.2	WBGene00020786
	fbxa-150	Y38H6C.11	WBGene00012624
	nas-33	K04E7.3	WBGene00003551
	obr-2	F14H8.1	WBGene00008832
	R11A5.4	R11A5.4	WBGene00011232
	lips-17	R07G3.2	WBGene00019939
	C08E3.13	C08E3.13	WBGene00015605
	R06B9.4	R06B9.4	WBGene00011055
	Y95B8A.6	Y95B8A.6	WBGene00022386
	tth-1	F08F1.8	WBGene00006649
	F01D5.1	F01D5.1	WBGene00008492
	pcca-1	F27D9.5	WBGene00017864
	Y46G5A.15	Y46G5A.15	WBGene00012906
	F47B8.4	F47B8.4	WBGene00009805
	F42F12.3	F42F12.3	WBGene00009635
	F26A1.9	F26A1.9	WBGene00017807
	C14H10.3	C14H10.3	WBGene00007593
	T07D10.3	T07D10.3	WBGene00011583
	sod-1	C15F1.7	WBGene00004930
	C33E10.8	C33E10.8	WBGene00016349
	C44B7.5	C44B7.5	WBGene00016627
	Y34F4.1	Y34F4.1	WBGene00021336
	mai-1	K10B3.9	WBGene00003124
	C29F9.3	C29F9.3	WBGene00016218
	C55A6.6	C55A6.6	WBGene00008335
	ttr-17	Y5F2A.2	WBGene00012383
	ttr-39	C04G2.1	WBGene00007304
	C33G8.3	C33G8.3	WBGene00016361
	T19D12.2	T19D12.2	WBGene00020577
	gst-42	D1053.1	WBGene00001790
	F53F8.4	F53F8.4	WBGene00010001
	F17A9.5	F17A9.5	WBGene00017537
	F13H8.11	F13H8.11	WBGene00017443
	C17G1.2	C17G1.2	WBGene00007649
	F20D1.3	F20D1.3	WBGene00008975
	B0507.2	B0507.2	WBGene00015219
	W05B10.4	W05B10.4	WBGene00012279
	Y39A3CR.5	Y39A3CR.5	WBGene00021445
	brp-1	Y79H2A.1	WBGene00000273
	E04F6.4	E04F6.4	WBGene00017124
	clp-4	Y39A3CL.5	WBGene00000545
	Y77E11A.2	Y77E11A.2	WBGene00022307
	K11G12.5	K11G12.5	WBGene00019656
	nlp-11	ZK1320.10	WBGene00003749
	T22C8.6	T22C8.6	WBGene00011927
	F56D5.6	F56D5.6	WBGene00010150
	Y4C6B.4	Y4C6B.4	WBGene00021158
	F13E6.4	F13E6.4	WBGene00008748
	F08G2.4	F08G2.4	WBGene00008576
	cal-2	C18E9.1	WBGene00000286
	rnh-1.0	F59A6.6	WBGene00004382
[truncated: 820 more rows]
